# A neuroanatomically grounded optimal control model of the compensatory eye movement system

P.J. Holland<sup>1,2,3,#</sup>, T.M. Sibindi<sup>1,2,4,#</sup>, M. Ginzburg<sup>2,#</sup>, S. Das<sup>1,2</sup>, K. Arkesteijn<sup>1,5,6</sup>, M.A. Frens<sup>1,\*,♥</sup>, O. Donchin<sup>1,2,7,♥</sup>

# These authors contributed equally

♥ So did these

1. Department of Neuroscience, Erasmus MC, Rotterdam, The Netherlands

2. Department of Biomedical Engineering, Zlotowski Centre for Neuroscience, Ben Gurion University, Beer-Sheva, Israel

3. School of Psychology, University of Birmingham, Birmingham, UK

4. Singapore Institute for Neurotechnology, Singapore

5. Department of Experimental and Applied Psychology, Vrije Universiteit, Amsterdam, The Netherlands.

6. Department of Human Movement Sciences, Vrije Universiteit, Amsterdam, The Netherlands.

7. ABC Centre for Robotics, Ben Gurion University, Beer-Sheva, Israel

## \* Correspondence:

Maarten Frens, Department of Neuroscience, Erasmus MC, PO Box 2040, 3000 CA Rotterdam, The Netherlands, [m.frens@erasmusmc.nl](mailto:m.frens@erasmusmc.nl)

Keywords: VOR, OKR, mouse, forward model, state estimation, adaptation

**Running title:** State Prediction Model of CEM

23 **Abstract**

24 We present a working model of the compensatory eye movement system. We challenge the model  
25 with a data set of eye movements in mice (n=34) recorded in 4 different sinusoidal stimulus  
26 conditions with 36 different combinations of frequency (0.1-3.2 Hz) and amplitude (0.5-8°) in each  
27 condition. The conditions included vestibular stimulation in the dark (vestibular-ocular reflex, VOR),  
28 optokinetic stimulation (optokinetic reflex, OKR), and two combined visual/vestibular conditions  
29 (the visual-vestibular ocular reflex, vVOR, and visual suppression of the VOR, sVOR). The model  
30 successfully reproduced the eye movements in all conditions, except for minor failures to predict  
31 phase when gain was very low. Most importantly, it could explain the non-linear summation of VOR  
32 and OKR when the two reflexes are activated simultaneously during vVOR stimulation. In addition  
33 to our own data, we also reproduced the behavior of the compensatory eye movement system found  
34 in the existing literature. These include its response to sum-of-sines stimuli, its response after lesions  
35 of the nucleus prepositus hypoglossi or the flocculus, characteristics of VOR adaptation, and  
36 characteristics of drift in the dark. Our model is based on ideas of state prediction and forward  
37 modeling that have been widely used in the study of motor control. However, it represents one of the  
38 first quantitative efforts to simulate the full range of behaviors of a specific system. The model has  
39 two separate processing loops, one for vestibular stimulation and one for visual stimulation.  
40 Importantly, state prediction in the visual processing loop depends on a forward model of residual  
41 retinal slip after vestibular processing. In addition, we hypothesize that adaptation in the system is  
42 primarily adaptation of this model. In other words, VOR adaptation happens primarily in the OKR  
43 loop.

44

45

## 46 **Introduction**

47 Optimal control is a widely used paradigm in current models of motor behavior (Frens and Donchin,  
48 2009; Haar and Donchin, 2019 [preprint]; Parrell et al., 2019 [preprint]; Shadmehr and Krakauer,  
49 2008). Optimal control suggests that the motor system operates in a "full feedback" mode: generating  
50 motor commands in response to the best guess regarding the current situation as opposed to using a  
51 pre-defined plan (Todorov and Jordan, 2002). However, it has proved very difficult to build optimal  
52 control models that make specific predictions for real, physiological motor circuits. In this paper, we  
53 address this gap by building a working quantitative model (Fig 1) of the compensatory eye movement  
54 system (CEM) starting from the ideas developed in the Frens and Donchin state predicting feedback  
55 control (SPFC) scheme (Frens and Donchin, 2009).

56 Compensatory eye movement is a general term for several reflexes whose goal is to maintain a stable  
57 image on the retina during movements of the head by moving the eyes in the opposite direction  
58 (Delgado-García, 2000). In other words, these reflexes serve to reduce retinal slip (movement of the  
59 visual image across the retina). The CEM system has a number of properties that make it a popular  
60 candidate for quantitative modeling of sensorimotor processes (Lisberger, 2009). First, its goal,  
61 minimizing retinal slip, is clear and invariant over time. Second, the dynamics of the system as a whole  
62 are close to linear. Third, the output only has three degrees of freedom. Moreover, horizontal CEM can  
63 be isolated from the other two degrees of freedom and treated as a system with a single degree of  
64 freedom. This is commonly done in the experimental literature, and it is our approach as well. However,  
65 since rotations are non-commutative, expanding the model to three dimensions is not trivial.

66 We chose to model and perform experiments in mice because mice, being afoveate, lack a confounding  
67 smooth pursuit system. In afoveate animals like mice, the CEM comprises two reflexes: the vestibulo-  
68 ocular reflex (VOR) uses vestibular input to predictively compensate retinal slip and the optokinetic  
69 reflex (OKR) is driven by the retinal slip itself. The two reflexes have roughly complementary



81 modifying processing of the vestibular state itself. The OKR loop, on the other hand, incorporates  
82 forward models of the eye, the visual input, and also the VOR system. That is, the OKR not only  
83 predicts current retinal slip based on models of the environment and the eye movements, it also  
84 incorporates a model of the residual retinal slip that remains after the actions of the VOR loop.

85 We wanted a model that reproduces the main characteristics of mouse vVOR (rotation of the animal  
86 in the light, providing simultaneous visual and vestibular stimulation), without needing to carefully  
87 tweak the model parameters. Furthermore, the same set of parameters should then result in good  
88 predictions of responses in VOR, OKR and additional conditions, i.e. suppressed VOR (sVOR;  
89 simultaneous rotation of the animal and its visual surroundings), and responses to sum-of-sines (SOS)  
90 stimuli. Furthermore, in order to test the relation between the different pieces of the model and the  
91 underlying anatomy, lesions in specific parts of the model should mimic actual lesions in the associated  
92 brain structures.

93 We also modeled adaptation. We postulate that the primary adaptation of the CEM system is in the  
94 OKR part of the system. This is consistent with experimental findings (as reviewed in the discussion)  
95 and also with our hypothesis that the OKR loop is more dependent on forward model prediction than  
96 the VOR. Thus, adaptation of the CEM system (at least to first approximation) is mostly adaptation of  
97 the OKR model of VOR inaccuracies (Fig 1; Post-VOR Slip). An additional test of our model is that  
98 it should be possible to set the value of  $\zeta$  adaptively, thus mimicking VOR adaptation

99 Finally, in order to compare our model to data, we collected from mice in a large set of conditions  
100 (VOR, OKR, vVOR, sVOR, SOS), frequencies and amplitudes. Such a data set was lacking in the  
101 literature so that our contribution in this work, beyond a model that fits all existing data, is a  
102 comprehensive data set showing OKR behavior across a complete array of stimuli.

103

## 104 **Materials and Methods**

### 105 **Model**

106 The model was implemented in Matlab (version 2016a; The MathWorks, Natick, MA, USA) and  
107 calculations were performed via matrix multiplication with a time step of 1 ms. Details are provided  
108 in the Supplementary Material.

109 **VOR:** The mouse VOR uses vestibular input from the semi-circular canals (labyrinth) to compensate  
110 head movement (Delgado-García, 2000). Vestibular afferents from the labyrinth project directly to VN  
111 with a small delay (2ms; Sohmer et al., 1999). Their activity accurately reflects head velocity at high  
112 frequencies but not at low frequencies (Robinson, 1981) due to filtering properties of the vestibular  
113 labyrinth (Yang and Hullar, 2007). Thus, in modeling VOR, the processing is quite simple (green areas  
114 in Fig 1). Since the system has no access to the actual head velocity, we use the vestibular signal as an  
115 approximation of the head velocity. Neither system dynamics nor the oculomotor command affect head  
116 dynamics. Note, therefore, that this model currently does not distinguish between active and passive  
117 head movements, i.e. it does not incorporate efference copy or proprioceptive information about head  
118 movement.

119 The job of the second part of the control loop is to estimate the retinal slip that will be uncompensated  
120 by the VOR (Post-VOR Slip) and then compensate for it. Post-VOR slip arises from two sources: from  
121 changes in the velocity of the visual stimulus and from head movements not compensated by the VOR.  
122 These signals represent the predicted retinal slip for which the OKR needs to correct. The combination  
123 of this predicted retinal slip combined with an estimate of how much the OKR is moving the eye, gives  
124 the OKR's forward model prediction of uncompensated retinal slip (right orange hexagon in Fig 1).

125 **OKR:** In the mouse, the OKR originates in velocity sensitive neurons of the retina, which project  
126 through the Accessory Optic System (AOS) and Nucleus Reticularis Tegmenti Pontis (NRTP) to the  
127 vestibular nucleus (VN) and the vestibulo-cerebellum (Gerrits et al., 1984; Glickstein et al., 1994;

128 Langer et al., 1985). The VN output is sent to the brainstem nuclei, which drive the extra-ocular  
129 muscles. In the case of horizontal eye movements, these are the abducens nucleus (Ab), the oculomotor  
130 nucleus (OMN) and nucleus prepositus hypoglossi (NPH; Büttner-Ennever and Büttner, 1992). The  
131 OKR has a species-dependent response delay of 70-120 ms (van Alphen et al., 2001; Collewijn, 1969;  
132 Winkelman and Frens, 2006) primarily caused by the visual processing in the pathway from retina to  
133 VN (Graf et al., 1988). The retinal afferents saturate at high velocities (Oyster et al., 1972; Soodak and  
134 Simpson, 1988), causing non-linearities in the OKR in this range (van Alphen et al., 2001; Collewijn,  
135 1969). Thus, the OKR is ineffective in compensating high velocity (and thus often high frequency)  
136 visual stimuli.

137 In our model, the OKR system models the effect of VOR as a linear correction for the sensed head  
138 velocity. That is, it assumes that VOR compensates for some fraction of the head movement. Thus, our  
139 forward model estimate of movement of the visual surrounding (Post-VOR Slip; left orange hexagon  
140 in Fig 1) will be updated by a factor proportional to head acceleration (See also Eq 29 in Supplementary  
141 text). The specific constant of proportionality,  $\zeta$ , is discussed in the section on VOR adaptation below.

142 As one can see in Figure 1, state estimation produces estimates of both Post-VOR slip, and  
143 uncompensated retinal slip (oval boxes). Post-VOR slip is retinal slip after VOR compensation and  
144 uncompensated slip is that remaining after the action of both systems. The state estimator approximates  
145 a Kalman filter, where gain was chosen by hand to match the data instead of being set at the Kalman  
146 gain (see Supplementary Material, Eq 42). Thus, through the model architecture, vestibular input only  
147 affects our estimate of the head velocity, and retinal input affects both our estimate of retinal slip and  
148 our estimate of uncompensated retinal slip.

149

150 VOR adaptation

151 VOR adaptation occurs when gaze consistently fails to compensate head movement (Blazquez et al.,  
152 2004; Schonewille et al., 2010; Shin et al., 2014). In a laboratory environment, a rotating visual  
153 environment can lead such failure (as described in the Methods below). This causes persistent changes  
154 in the VOR, such that retinal slip is reduced in the new situation. In our model, such a mismatch would  
155 affect the proportionality constant  $\zeta$ . This is because the OKR system's assumption that retinal slip is  
156 the result of inaccuracies in the VOR loop (see Supplementary Material).

157 Parameters

158 In the model only a few parameters were set to match the data. They were set to match data in the  
159 vVOR condition and then the same parameters were used for all conditions. Most variables were either  
160 taken from literature, or experimentally derived by us in separate experiments. Interestingly, it turned  
161 out that the model produced very similar behavior across a wide range of values for most parameters  
162 although it was sensitive to a few parameters (see table 1). As much as possible, parameters were  
163 determined from the literature or from our own data. For example, we determined the maximum VOR  
164 and OKR gains from our own data. We used the response to high frequency stimulation to set the  
165 maximum gain of the VOR in the model and the response to low velocity stimulation to set the  
166 maximum gain of the OKR in the model. The form of the non-linearity in retinal slip was fit to  
167 published results (Oyster et al., 1972; Soodak and Simpson, 1988). On the other hand, the filter of the  
168 vestibular afferents was shaped to achieve the best fit to the data. Ultimately, the filter that fit our data  
169 best was also compatible with the literature. We used a first order high pass filter with a time constant  
170 of 4 s (Yang and Hullar, 2007). Similarly, drift velocity and VOR adaptation speed were fit to data and  
171 later found to be compatible with the literature (Schonewille et al., 2010; Stahl et al., 2006).

172

173



## 174 **Animals**

175 In order to test the model we recorded CEM in 13 C57Bl/6J mice (Charles River, Wilmington, MA,  
176 USA). We employed four different paradigms i.e. OKR, VOR, sVOR, and vVOR and in each condition  
177 we tested a wide range of frequency and amplitude combinations. Details on the experiments are  
178 described in the Supplementary Material. Additionally, we measured the drift of the eye back to a  
179 central position in the dark (N=6) and the rate of adaptation of the VOR (N=7), full details of the  
180 methods are described in the supplementary material.  
181 Prior to all eye movement recordings, mice underwent surgery to prepare them for head fixation and  
182 were allowed sufficient time to recover, details are provided in the supplementary material and the full  
183 procedure is described in van Alphen (2009).

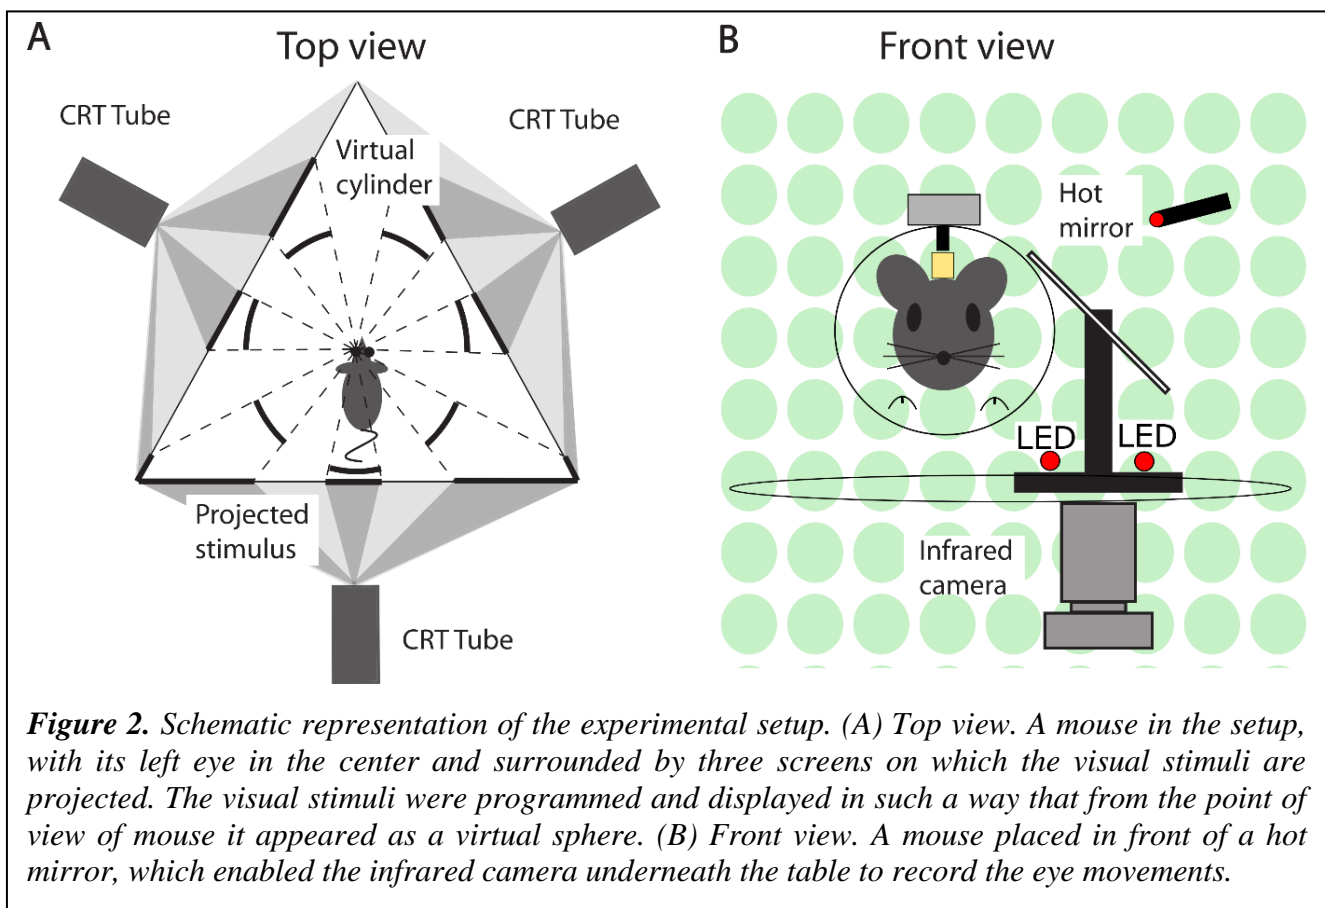

184 During an experimental session, mice were immobilized by placing them in a plastic tube with the head  
185 protruding and the head fixation attached to the turntable with the eye in the central position. Eye  
186 movements were recorded via an infra-red video system (Iscan ETL-200, Iscan, Burlington, MA, USA)  
187 at a frequency of 120 Hz. Visual stimuli were presented using a modified projector (Christie Digital  
188 Systems, Cypress, CA, USA) displaying a panoramic field of 1592 green dots on virtual sphere fully  
189 surrounding the animal. Rotation of the sphere around the vertical axis provided the moving stimuli.  
190 Vestibular stimulation was provided via a motorized turntable Mavilor-DC motor 80 (Mavilor Motors  
191 S.A., Barcelona, Spain) on which the mouse and eye movement recording system were mounted.  
192 Further details are provided in the supplementary material and a schematic representation of the  
193 stimulus and eye movement recording apparatus in Figure 2.  
194 The VOR adaptation experimental paradigm consisted of an identical stimulus setup with the animal  
195 undergoing 6 VOR trials (1 min duration, 1 Hz, 5°) to measure the gain alternating with 5 sVOR trials  
196 (5 min duration, 1 Hz, 5°) to induce adaptation.

## 197 **Data Analysis**

198 Every mouse was tested once in each condition, and each stimulus consisted of at least 5 cycles. Full  
199 details of the analysis details are provided in the supplementary material. Briefly, following filtering  
200 and removal of fast phase eye movements gain and phase data was calculated by a Bayesian fitting  
201 procedure in OpenBugs (Version 3.2.3, <http://www.openbugs.net>, [Lunn et al., 2009] ) and Matlab  
202 curve fitting routines, for single sinusoid stimuli and for SoS stimuli respectively. The Matlab code  
203 and data required for replication of the analysis presented in this paper is available on the Open  
204 Science Framework website (<https://osf.io/feq7c/>).

205

206 **Results**

207 **Responses to sinusoidal stimulation**

208 The behavioral data that we present are in  
 209 agreement with the values that have been  
 210 previously published for the C57BL/6  
 211 mouse strain (van Alphen et al., 2010;  
 212 Faulstich et al., 2004; Schonewille et al.,  
 213 2011; Stahl et al., 2000). The VOR (Fig  
 214 3) in the dark responded to high  
 215 frequency stimulation, and the OKR (Fig  
 216 4) was mainly active in response to low  
 217 velocity stimuli (van Alphen et al., 2001).  
 218 The vVOR (Fig 5) was more or less  
 219 veridical over the whole stimulus range  
 220 while suppression in the sVOR (Fig 6)  
 221 paradigm mainly happened at low  
 222 frequency/velocity conditions.

223 In Figure 3 we show a comparison of  
 224 experimental and simulated VOR. We  
 225 see that there is a good match between  
 226 simulation and average experimental  
 227 response over the whole stimulus range.

228 First, a high gain at high frequencies and lower gain at low frequencies is clearly observable.

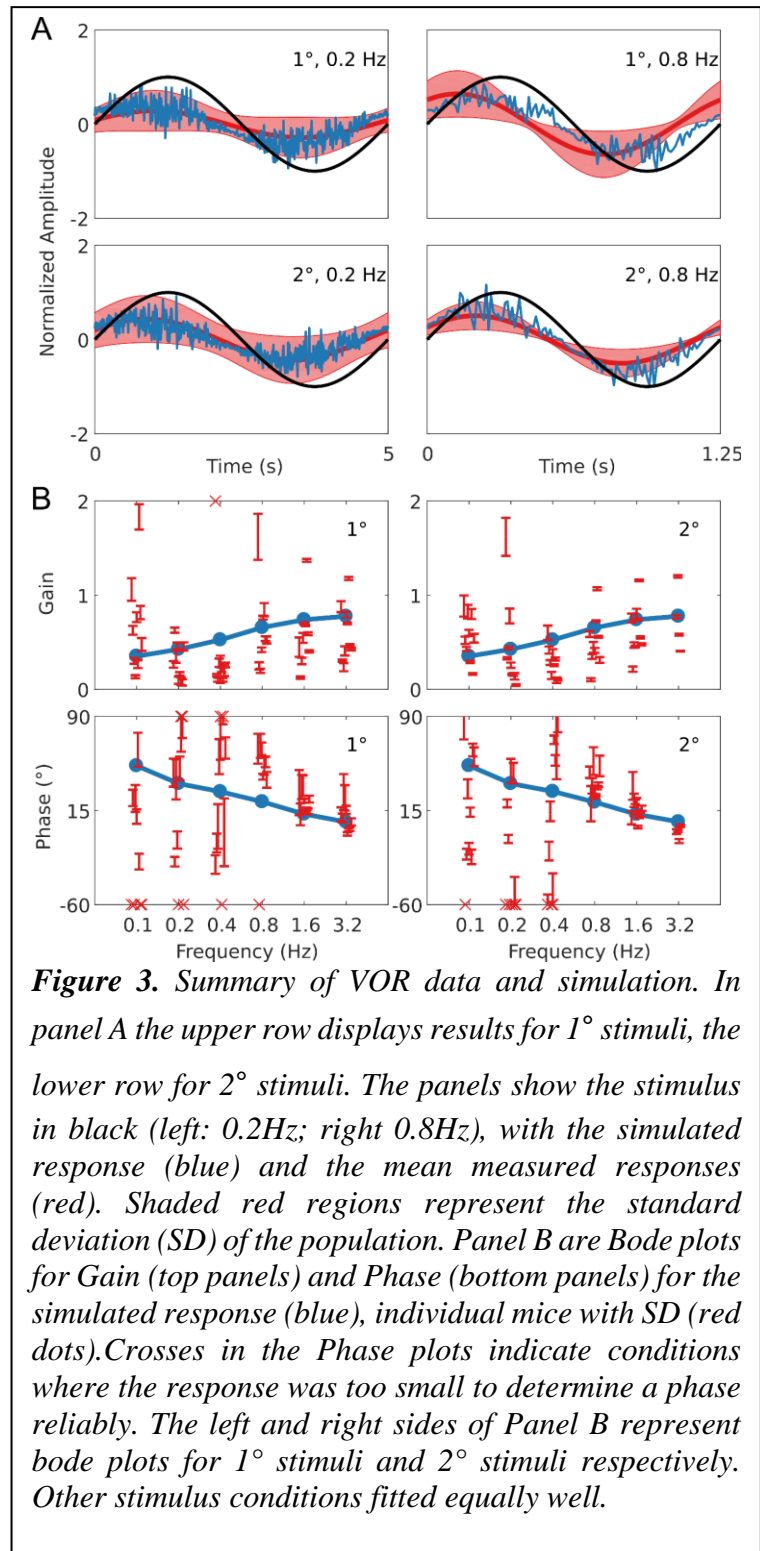

229 Furthermore, we see a phase lead at low  
230 frequencies which diminishes with increasing  
231 stimulus frequency.

232 Figure 4 follows the same format as Figure 3 but  
233 compares simulation to experimental results for  
234 the OKR response. The simulation nicely  
235 predicts the main features of the OKR response.  
236 The gain decreases and the phase lag increases  
237 with increasing stimulus velocity.

238 Figure 5 shows how well simulations predict  
239 experimental data for combined visual and  
240 vestibular stimulation (vVOR). In both the  
241 simulation and experimental data, we observe  
242 high gain and almost no phase lead or lag  
243 between response and stimulus. These results  
244 show that VOR and OKR have complementary

245 results, which allows the combined system to produce excellent compensation of the retinal slip.

246 Figure 6 depicts how the model fits experimental data generated during sVOR – suppression of the  
247 VOR response with visual input. The response in high frequencies looks very similar to that in VOR  
248 because OKR is not responsive in high frequencies (see Fig. 4), and hence cannot suppress vestibular  
249 triggered response. At low frequencies, there is a very small response, because VOR has low gain and  
250 is further suppressed by OKR. At these low frequencies, where the gain is low and variable, the model  
251 systematically misrepresents the phase of the eye movement.

252 In order to examine the overall quality of fit in each of the four experimental conditions above, we  
253 calculated the Z-scores of the overall fitting quality. These are displayed in Figure 7. Note how the

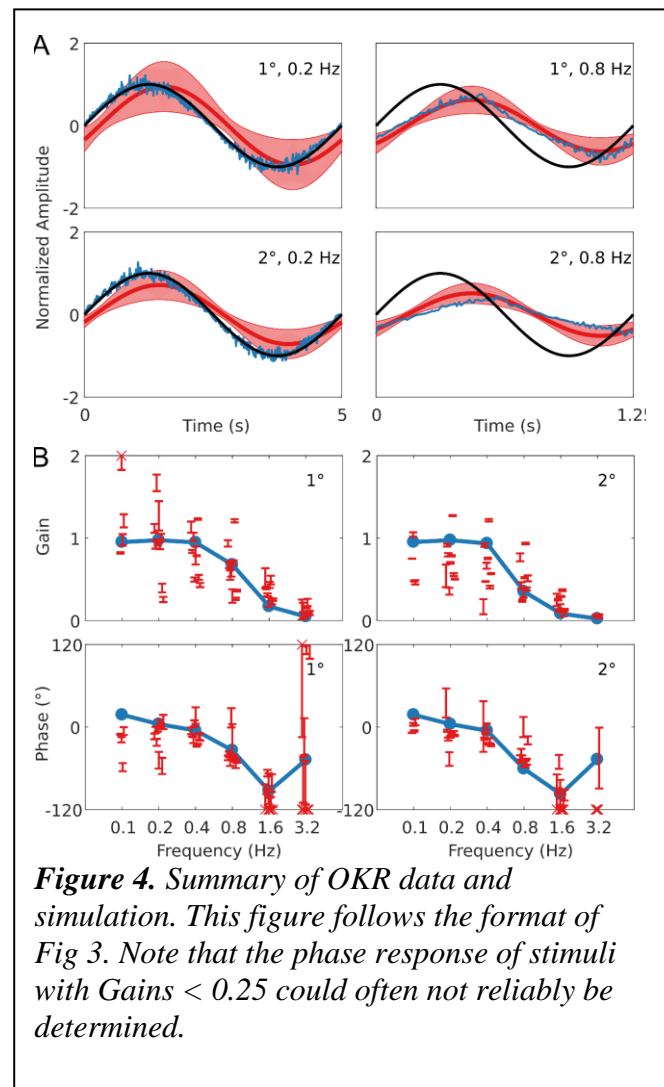

**Figure 4.** Summary of OKR data and simulation. This figure follows the format of Fig 3. Note that the phase response of stimuli with Gains < 0.25 could often not reliably be determined.

254 overall fit quality is good (“cool” colors  
255 in the heat map), with some poorer fits in  
256 the low frequency/high amplitude range  
257 of the sVOR condition. Because of the  
258 low amplitudes and high variability, the  
259 phase offset of the model at the lower  
260 frequencies does not lead to large Z-  
261 scores.

262 In addition to the comparison of model  
263 and data in terms of Z-scores (Fig 7), we  
264 also used the Bayesian estimates to  
265 generate probabilities for the model  
266 response falling outside the range of the  
267 behavior of a ‘typical mouse’. These  
268 tests were carried out for every  
269 frequency and amplitude combination

270 and assessed the similarity of gain and phase separately, a combined probability was then generated  
271 from the product of these. The results of these tests are presented in the supplementary material.  
272 Overall the model responds within the range of a typical mouse for both gain and phase individually  
273 and when combined.

274

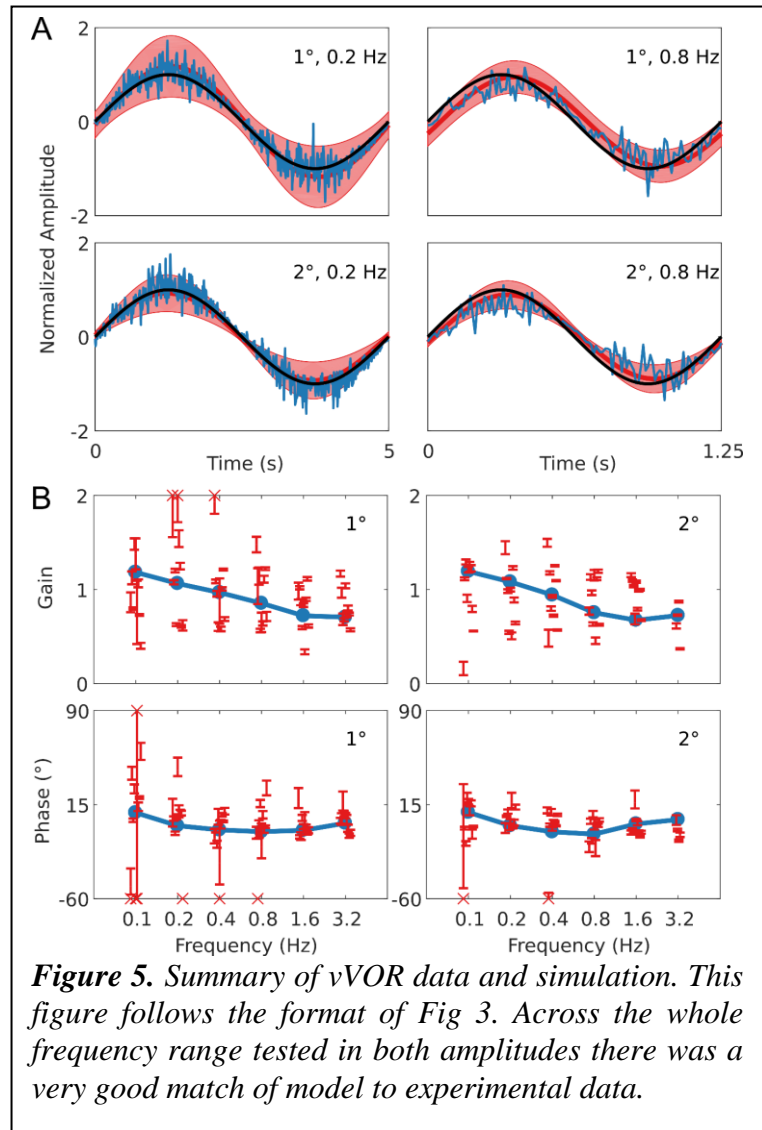

**Figure 5.** Summary of vVOR data and simulation. This figure follows the format of Fig 3. Across the whole frequency range tested in both amplitudes there was a very good match of model to experimental data.

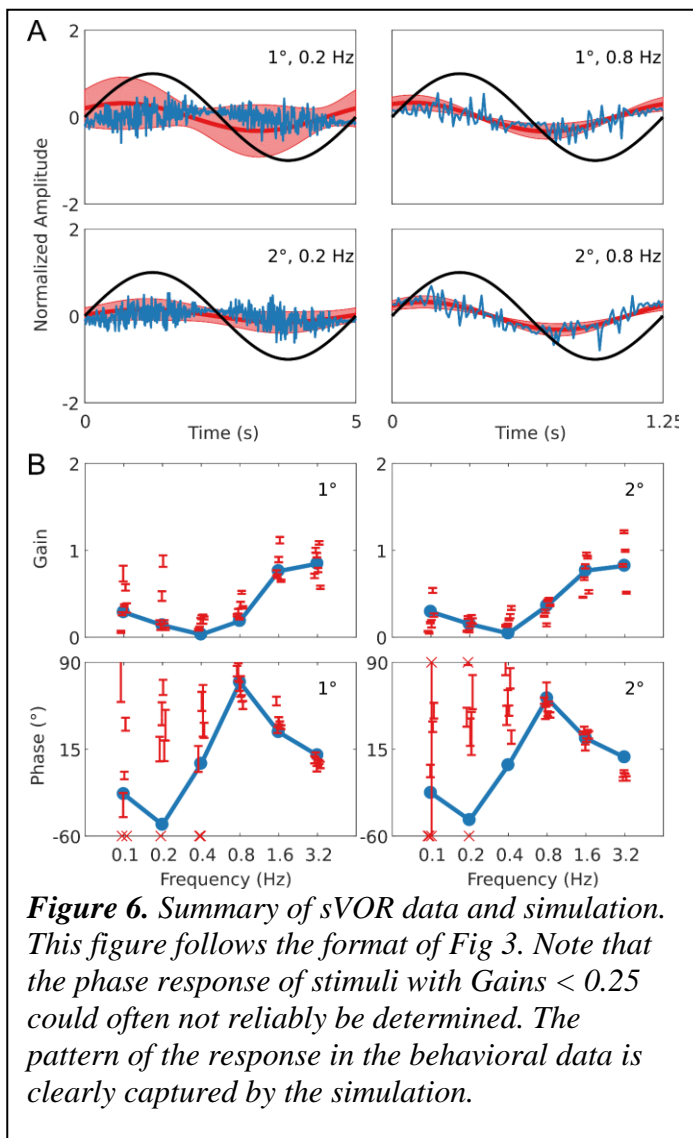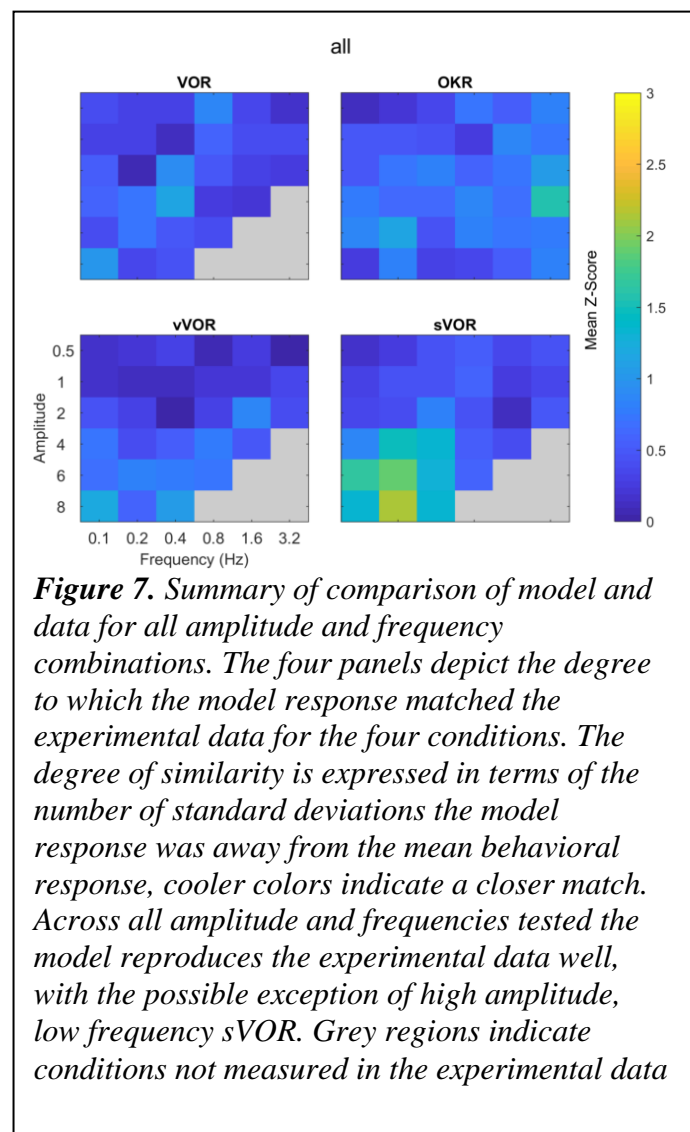

## 275 Model Dynamics

276 The interaction of the different parts of the model in one of the conditions (vVOR, amplitude 2,  
 277 frequency 0.2 Hz) are shown in Figure 8. The figure shows one cycle of the activity in each of the  
 278 different areas being modeled during the steady state response to this stimulus. The top two boxes  
 279 show that in this condition, the head is being rotated but the eyes are moving to keep the retinal slip  
 280 at 0. The head rotation passes through the system in a feedforward manner to drive the vestibular  
 281 controller. Additionally, this controller is modulated by knowledge of the eye position and velocity,  
 282 driven by the forward model integration of the vestibular command. The figure also shows how the  
 283 head rotation drives an estimate of the retinal slip that would remain uncompensated by the VOR



284 controller. This is labeled post-VOR slip. Post-VOR slip in turn drives the activity of the OKR  
 285 controller. Note that in this condition, the system estimates that the VOR will over-compensate for  
 286 the head rotation and the OKR controller generator actually generates a command that is roughly in  
 287 counter-phase with that of the VOR controller. The success of the vVOR in generating eye  
 288 movements that fully compensate for the head movement are the result of a balance between the  
 289 VOR signal and the OKR signal. Without the balancing OKR signal, the gain of the VOR would  
 290 need to be lowered to achieve veridical tracking, which would compromise the quality of the VOR.

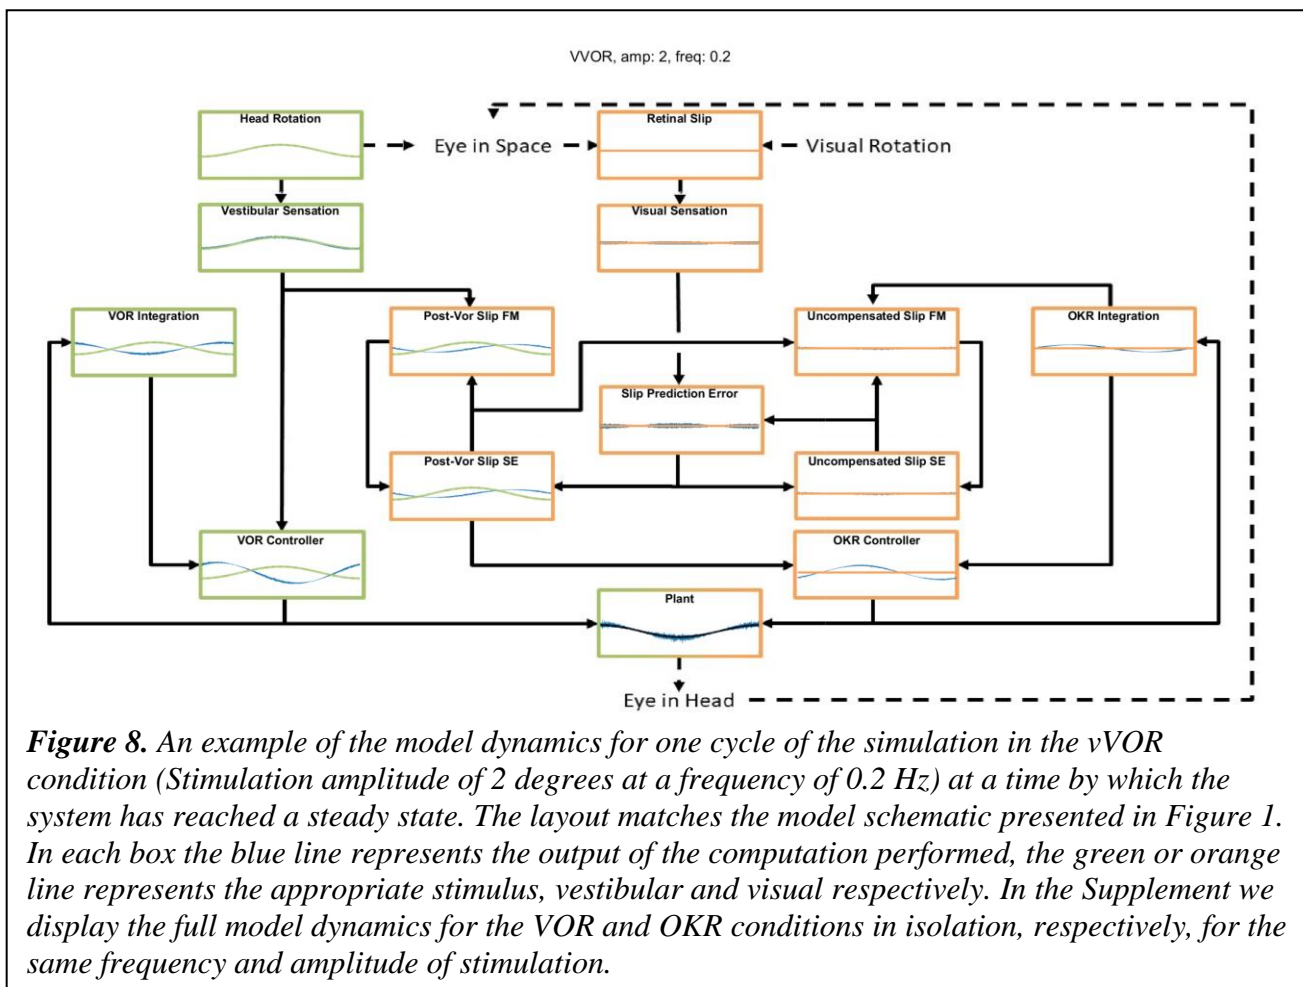

291 Figure 8 also shows that in this situation the OKR system has stabilized, such that retinal slip  
 292 prediction error is 0. If there were prediction error, generated by either a transient visual or vestibular  
 293 perturbation, this would drive an increase in the post-VOR slip which would then cause a transient

294 increase in the OKR command to correct for the extra slip. The OKR system thus serves in two  
 295 complementary roles: it generates a feedforward correction for the inaccuracies of the VOR system  
 296 (the size of which is learned through adaptation, as described below) and it generates an error driven  
 297 correction for unexpected retinal slip. The figure thus demonstrates the balance between the VOR  
 298 command, post-VOR slip and OKR command that are necessary to achieve veridical tracking in the  
 299 vVOR condition. Figures in the supplementary results show dynamic plots for other stimulus  
 300 conditions and other frequencies and amplitudes, but it is this interaction which is the key innovation  
 301 of our model.

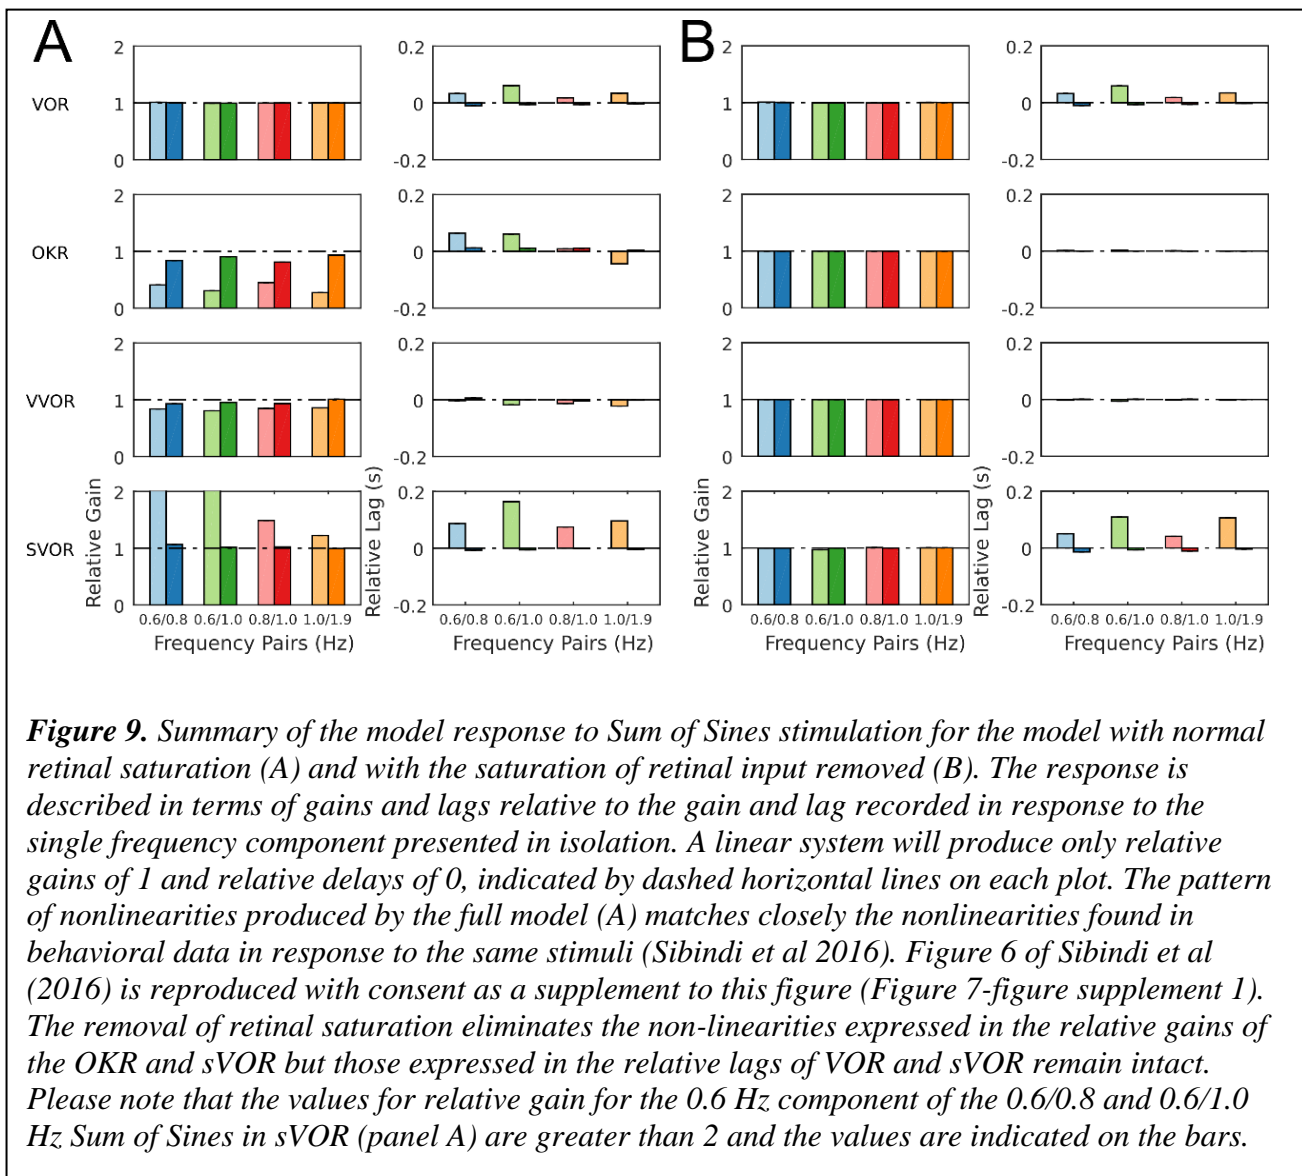



## 302 **Sum of Sines**

303 When the mouse OKR responds to sum-of-sines (SoS) stimuli, we have previously reported relative  
304 gain suppression of the lower of two frequencies in the stimulus. Conversely, in sVOR, results showed  
305 gain enhancement in the lower frequency component. In both sVOR and VOR, an overall decrease in  
306 phase lead was observed. For more details see (Sibindi et al., 2016). When applying these stimuli to  
307 the model, the main pattern of effects is reproduced. Thus, we find qualitatively similar changes in  
308 both the relative gain and delay of the constituting frequencies (Fig 9A). Importantly, removal of retinal  
309 saturation eliminates the non-linearities expressed in the gain of the response (Fig 9B).

## 310 **VOR Adaptation**

311 Perhaps counterintuitively, VOR adaptation occurs as a result of changes in the OKR's model of VOR.  
312 Adaptation modifies the OKR's prediction of post-VOR slip. Thus, adaptation in our model involved  
313 allowing the parameter  $\zeta$  to vary in response to retinal slip prediction error using gradient descent. As  
314 derived in the supplementary material, the gradient is in the direction that decorrelates head  
315 acceleration and retinal slip prediction error. The minimum error had a broad basin of attraction. Thus,  
316 regardless of the starting value of  $\zeta$ , it always converged to the same value of -0.6, if the stimulation  
317 frequency was kept constant at 1 Hz. The value to which  $\zeta$  converged depended on stimulus frequency  
318 but not amplitude. Nevertheless, for a broad range of frequencies  $\zeta$  assumed a value around -0.6.

319 The adaptation protocol reduced the gain of the VOR in mice to around 50% of its original value (Fig  
320 10), comparable to that which has been previously described in literature (Schonewille et al., 2011).

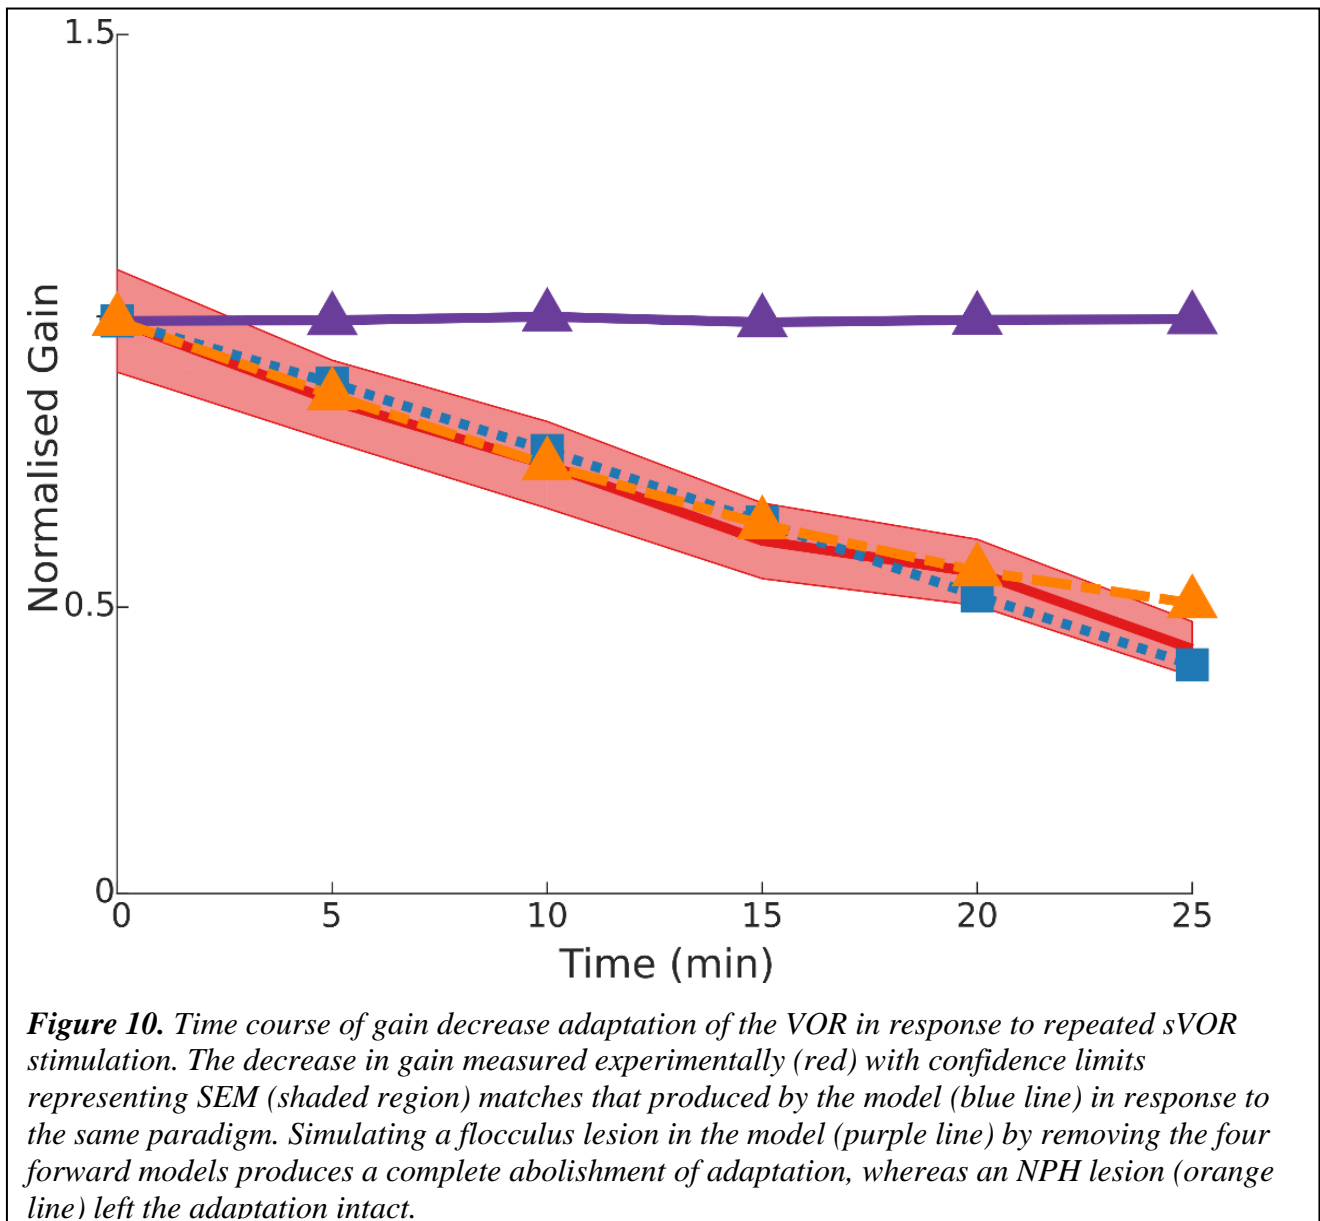

### 321 **Effects of lesions**

322 In the model we simulated a lesion of the flocculus and a lesion of the NPH. The way in which this  
323 should be done in the model depends on the role that is ascribed to either structure (see Discussion).

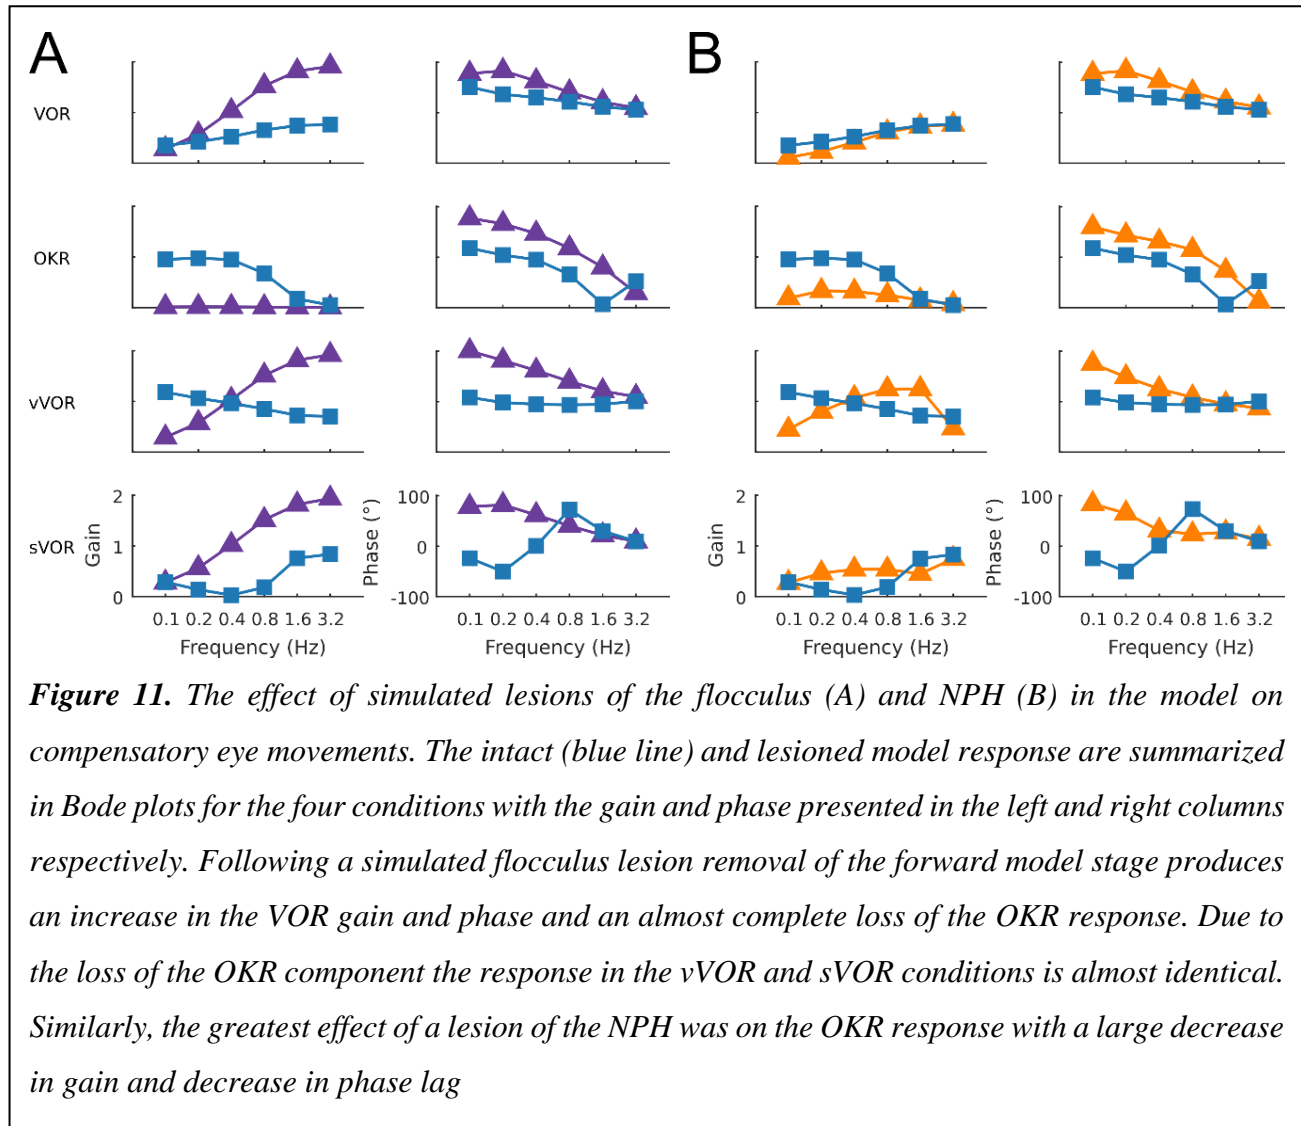

### 324 Flocculus lesions

325 We modeled a lesion of the flocculus by removing all the Forward Model boxes (Hexagon boxes in  
 326 Figure 1). Figure 11A shows the result. The OKR is virtually absent. Meanwhile VOR gain is  
 327 increased, and VOR phase increases at low frequencies. Following a model floccular lesion, the VOR  
 328 did not adapt (Fig 10).

### 329 NPH lesions

330 If one believes the NPH to be part of the controller (Green et al., 2007), a lesion of the NPH would  
 331 mean removing the inputs of the two outer hexagonal Forward Model boxes of Figure 1. A lesion of  
 332 the flocculus would then be setting the values of all Forward Model boxes to a constant value of 0.

333 Alternatively, if one believes the NPH is the oculomotor integrator (Cannon and Robinson, 1987), an  
334 NPH lesion means setting the output of (outer, hexagonal [Fig 1]) integration boxes to 0. A lesion then  
335 only affects the two inner FM boxes of Figure 1 (“post-VOR slip” and “uncompensated slip”). We  
336 tested both manipulations.

337 Both types of lesion of the NPH resulted in exactly the same result. This is not surprising, since they  
338 are equivalent to setting the input to the integration step to 0, or setting the output to 0. Both produced  
339 a small effect on the VOR with a decrease in gain at low frequencies, reflecting the mainly feed forward  
340 nature of response. OKR in contrast was greatly affected with a large decrease in gain (Figure 11B).  
341 As expected (see discussion), the lesion also had an effect on the drift of the eyes back to the center in  
342 the dark, decreasing the time constant from 2.83s to 0.31s. Stahl et al (2006) report a time constant on  
343 the order of 5s for the neural integrator in C57BL/6 mice, although there was considerable variation  
344 between mice and over time.

345 Cheron et al (1986a, 1986b) made lesions in the NPH of cats. They show that such a lesion reduces  
346 low frequency VOR responses and completely abolishes OKR. However, the gain and phase  
347 measurements do not depict the full nature of the changes in the response to OKR. When applying low  
348 velocity stimuli, the OKR in our model becomes noisy and dominated by oscillations at the time points  
349 in which stimulus velocity is highest (Fig 12).

350 In our model, NPH lesions do not affect adaptation to the sVOR stimulation at 1Hz (Fig 10), because  
351 the individual reflexes at that frequency are relatively unaffected, and the site of plasticity is not  
352 lesioned.

### 353 **Effect of Lesions on Dynamics**

354 To better understand how the different lesions affect the internal dynamics of the model, Figure 12  
355 presents the post-VOR slip and the activity of the visual, vestibular and combined controllers in each

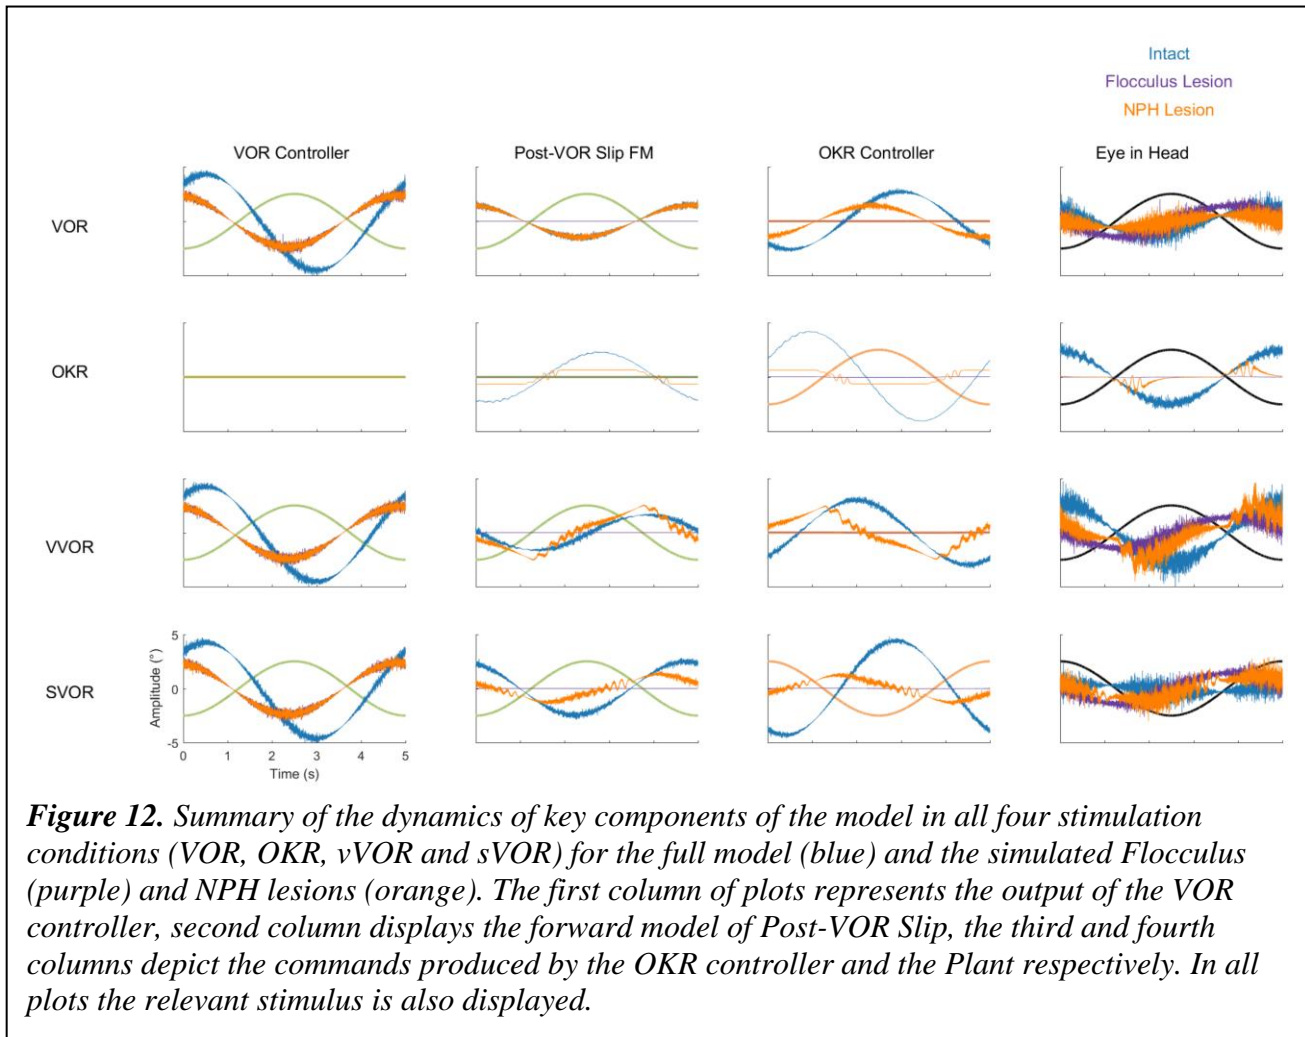

356 of the lesion conditions for each of the four different stimulus conditions. There are a number of key  
 357 findings. First, both the floccular and NPH lesion have the same effect on the vestibular command.  
 358 This is because both lesions impact the vestibular command by eliminating forward model estimation  
 359 of eye eccentricity. This leads to a decreased amplitude and increased phase lag in the vestibular  
 360 command. Meanwhile, it can be clearly seen that the NPH lesion primarily affects the magnitude of  
 361 the OKR.

362

## 363 **Discussion**

### 364 *Brief summary of results*

365 Frens and Donchin (2009) proposed that CEM can be modeled by an SPFC framework where specific  
366 functional roles can be ascribed to specific nuclei in the CEM circuitry. Here, we measured –for the  
367 first time- VOR, OKR, vVOR and sVOR over a large range of frequencies and amplitudes in the same  
368 animals. We then implement the SPFC framework in a detailed computational model which can, with  
369 a single set of parameters, mimic the behavior of OKR and VOR (Fig 3, 4 and 7). With the same set of  
370 parameters, the model also reproduces vVOR, sVOR (Fig 5, 6 and 7) and non-periodic SoS-stimuli  
371 (Fig 9). Furthermore, it successfully predicts the effects of lesions (Fig 11 and 12) and has adaptive  
372 behavior, similar to VOR learning (Fig 10).

373 The strength of this model is that it has relatively few critical parameters (see table 1) and that the  
374 critical parameters can be straightforwardly experimentally derived. This is an advantage over other  
375 SPFC-like models that address other motor systems (Shadmehr and Krakauer, 2008).

376 Key to the model are two distinct circuits for VOR and OKR. The VOR loop is relatively simple, and  
377 mainly consists of an integration step. In traditional models (for review see Glasauer, 2007), the OKR  
378 responds to actual retinal slip. However, due to the relatively long delay of the visual processing, the  
379 OKR response would then typically respond late. OKR state estimation in our model resolves this by  
380 predicting retinal slip. Both the VOR and the OKR loop contribute to this internal estimate of  
381 (uncompensated) retinal slip. This combined contribution is necessary, since the OKR assumes that the  
382 vestibular system will only partially resolve the retinal slip. While the reality may be more complex,  
383 the idea that the OKR models the VOR was the only way that we could explain the relatively high  
384 gains of both the OKR and VOR systems in isolation with the veridical gain of the two systems  
385 combined.

386

387 Finally, our model implements adaptation as a recalibration of this OKR estimate of VOR slip  
388 compensation. This helps explain why floccular lesions have a stronger direct effect on OKR but also  
389 disrupt VOR adaptation.

### 390 **The non-linear response to SoS stimulation**

391 In addition to reproducing the response to sinusoidal stimulation in a wide range of conditions, the  
392 model also matched responses to SoS-stimuli that are identical to those previously used by (Sibindi et  
393 al., 2016). Strikingly, two non-linearities reported in the results of that study were reproduced: The  
394 first is that when confronted with a stimulus that consists of two non-harmonic optokinetic sinusoids,  
395 the amplitude of the lower frequency is suppressed, independent of the absolute value of the constituent  
396 frequencies. This then also results in changes in the amplitudes in vVOR and sVOR conditions. The  
397 second is that the lag of the response to the lower frequency is larger, resulting in a delayed overall  
398 response. This can be seen for both VOR, OKR and its combinations.

399 The model has one non-linearity specifically built in: the saturation of the visual motion sensitive  
400 neurons in the retina (see Eq 8 in the Supplementary Material). Explicitly removing this saturation  
401 eliminated the gain decrease and delay increase of the OKR and vVOR, but left the increased delays  
402 in the VOR and sVOR unaffected (Fig 9).

403 These modeling results support the hypothesis that Sibindi et al. used to explain their results: increased  
404 delays may be a result of the circuit properties. That is, they suggest the forward model fails to predict  
405 upcoming retinal slip in complex stimuli. Our results also support their hypothesis that the gain changes  
406 are probably the result of non-linear retinal processing.

407

## 408 **The role of the flocculus**

409 The flocculus acts as a forward model for both the VOR and the OKR loop. However, the role it plays  
410 in each reflex is completely different. The flocculus is not critical for VOR performance, as animals  
411 lacking Purkinje cells do have an intact VOR although the amplitude of the response is significantly  
412 higher (van Alphen et al., 2001). While our model does include a forward model and state estimator  
413 for head velocity, this is only a formal result of the structure of the model. In fact, our model ignores  
414 the results of the forward model and uses the sensory information exclusively to determine head  
415 velocity. Thus, the role of the forward model (green hexagon in Fig 1) in this system is actually only  
416 to integrate eye velocity into eye position. For the OKR loop the forward model helps to overcome the  
417 delay in the OKR feedback loop, and it is crucial to provide information about the estimated post-VOR  
418 slip.

419 We mimicked lesioning the flocculus by removing the output of the forward models. This removed  
420 the capability of the system to predict upcoming retinal slip. As a result, the optokinetic response was  
421 virtually abolished whereas VOR gain substantially increased (Fig 11A). Lurcher-mice, a mutant  
422 strain that lacks Purkinje cells, have substantially lower OKR gains than their wild type littermates  
423 (van Alphen et al., 2002). Lurcher-mice results are also similar to a floccular lesion in our model in  
424 that VOR-gain is increased. Results on VOR gain in acute, non-genetic floccular lesions are mixed  
425 (Rambold et al., 2002).

426 We can understand the results showing increased VOR gain in Lurcher mice using our model: the  
427 OKR generally acts to suppress the VOR and a floccular lesion releases this suppression. This  
428 interpretation leads to the further prediction that floccular lesions will reduce the effect of visual  
429 suppression of the VOR, increasing gains in the sVOR. This is true in our model as well as being  
430 compatible with the literature (Belton and McCrea, 2000; Takemori and Cohen, 1974; Zee et al.,  
431 1981).



432 The change in phase of VOR response that is seen in Lurcher mice (van Alphen et al., 2002) can be  
433 modeled only if we include the VOR integration stage in the flocculus. This supports the view of  
434 Green et al (2007) that the NPH provides an efference copy that is integrated in the flocculus (see  
435 below).

### 436 **The role of the NPH**

437 Our model provides a potential resolution to a debate about the role of the NPH in eye movement  
438 generation. In Robinson's inverse-model framework, the NPH is thought to act as the neural integrator  
439 for horizontal eye position. Such an integrator is necessary to provide the abducens nucleus with both  
440 velocity and position commands that are needed to overcome the low-pass filtering properties of the  
441 plant (Robinson, 1981). This view has been widely adopted by researchers in the oculomotor system.  
442 A critical finding supporting this view is from Cannon and Robinson (1987) showing that lesions of  
443 the NPH cause the eye to drift towards the center of the oculomotor range. This is compatible with the  
444 loss of an integrator that opposes the elastic restoring forces of the plant. However, more recently Green  
445 et al. (2007) showed that the burst tonic neurons of the NPH have activity that is nearly identical to  
446 that of the motor neurons in the abducens nucleus. Furthermore, these neurons have direct projections  
447 to the flocculus (Belknap and McCrea, 1988; Langer et al., 1985; McCrea and Baker, 1985). On the  
448 basis of these findings, they proposed that the NPH provides efference copy input to a cerebellar  
449 forward model (Ghasia et al., 2008; Green et al., 2007). This view was also incorporated in our SPFC  
450 (Frens and Donchin, 2009). Thus, in our model, an NPH lesion removes input to the forward models.  
451 However, when we lesion the NPH projection in our simulation (by removing efferent copy to the  
452 forward model or by removing its output), we found that we had reproduced the Cannon and Robinson  
453 (1987) result: the time constant of the drift was reduced. Hence, a lesion of the efference copy  
454 projection produces the same results as those thought to support the idea that NPH is an integrator. It

455 seems that the Canon and Robinson (1987) results are compatible with both models while recent  
456 anatomical and physiological findings support the idea of efferent copy.

### 457 **VOR Adaptation**

458 Within our framework, VOR adaptation happens through adaptive changes in the forward model of  
459 VOR used by OKR. OKR assumes that VOR will correct a certain fraction of sensed head velocity.  
460 Determining the proportionality constant robustly led to the same value regardless of stimulus  
461 amplitude over a wide range of frequencies. When challenged with an adaptation stimulus, the model  
462 gradually changed its gain. Of course, the rate of adaptation could be set arbitrarily. Our setting led to  
463 an adaptation speed that is very similar to what we experimentally found in mice under identical  
464 experimental conditions. To our knowledge, we are the first to suggest that VOR adaptation reflects  
465 adaptation of a forward model of VOR output. However, the idea is compatible with the recent  
466 suggestion that VOR adaptation is driven by the motor consequence of retinal slip rather than the slip  
467 itself (Shin et al., 2014). Floccular lesions in our model abolish VOR adaptation, which is in line with  
468 the literature (Schonewille et al., 2010). NPH lesions do not affect adaptation at 1 Hz in our model, but  
469 to the best of our knowledge there is no literature to corroborate this finding.

470 Although our model is capable of adaptation, we believe that adaptation in the biological system is  
471 probably more complex than that in our model. Biological adaptation seems to reflect plasticity at  
472 multiple sites with multiple time constants (Clopath et al., 2014; Gao et al., 2012; Porrill and Dean,  
473 2007). The introduction of more realistic adaptation and testing adaptation at higher and lower  
474 frequencies is an important future extension of the current model.

### 475 **Relationship to Other Models**

476 The CEM system is a popular candidate for computational modelling due to the known anatomical  
477 substrates and the restricted degrees of freedom. Theories of motor control are primarily based on one

478 of two main architectures. One theory suggests that the motor system relies on generating an ideal  
479 "desired movement" or "desired trajectory" that serves as a basis for subsequent control. Such an  
480 architecture faces a number of key challenges: generating the desired trajectory, translating it into  
481 motor commands, and correcting for deviations during online control. At the heart of such a system is  
482 an "inverse model" which translates desired movement into motor commands (Jordan and Rumelhart,  
483 1992). The literature in the CEM system contains a long tradition of such models (for example: Clopath  
484 et al., 2014; Glasauer, 2007; Kawato and Gomi, 1992; Lisberger, 2009; Robinson, 1981). In general, a  
485 desired motor command is fed to the brainstem, which then acts as an 'inverse plant', i.e. it processes  
486 the command in order to overcome the low-pass properties of the extraocular muscles and tissues that  
487 are connected to the eye.

488 The key innovation in our model is the use of recurrent cerebellar-vestibular nuclei loops which enable  
489 the model to function correctly in the presence of considerable motor and sensory noise and in the  
490 presence of significant delays in sensory feedback. There exists anatomical evidence for such loops  
491 (Büttner-Ennever and Büttner, 1992) and proposals for their functional significance have been made  
492 previously (Porrill et al., 2004).

493 Since the optimal control framework was originally proposed as an approach to understanding  
494 vertebrate motor systems, models of this sort have been implemented in the control of various motor  
495 tasks. The implementations closest to our model are those that attempt to describe coordinated head  
496 and eye movements during gaze shifts (Sağlam et al., 2011, 2014; Todorov and Jordan, 2002). One  
497 somewhat similar model has been proposed to describe the CEM system (Haith and Vijayakumar,  
498 2007). The Haith model is built largely to address adaptation to changing dynamics, an issue not  
499 addressed by our data or our model. Additionally, the Haith model is not confronted with actual data.  
500 In sum, our model is unique in a number of respects: (1) the extensive data with which it is challenged,  
501 including lesion data and non-sinusoidal data, (2) the idea that one of the main drivers of adaptation is

502 compensation of the OKR system for predicted VOR error, (3) the development of a fully realized  
503 recurrent model of the CEM system in the spirit of the optimal control feedback framework.

504

505 **Acknowledgements**

506 This research was supported by the C7 Marie Curie ITN initiative (TS, PH, SD), TC2N Interreg Grant  
507 (OD, MF), the ABC Robotics Initiative (OD) and a Post-Doctoral Fellowship from the Kreitman  
508 School for Advanced Studies at BGU (PH).

509

## 510 **References**

- 511 van Alphen, A.M., Stahl, J.S., and De Zeeuw, C.I. (2001). The dynamic characteristics of the mouse  
512 horizontal vestibulo-ocular and optokinetic response. *Brain Res.* 890, 296–305.
- 513 van Alphen, A.M., Schepers, T., Luo, C., and De Zeeuw, C.I. (2002). Motor Performance and Motor  
514 Learning in Lurcher Mice. *Ann. N. Y. Acad. Sci.* 978, 413–424.
- 515 van Alphen, B., Winkelman, B.H.J., and Frens, M.A. (2009). Age- and Sex-Related Differences in  
516 Contrast Sensitivity in C57Bl/6 Mice. *Investig. Ophthalmology Vis. Sci.* 50, 2451.
- 517 van Alphen, B., Winkelman, B.H.J., and Frens, M.A. (2010). Three-Dimensional Optokinetic Eye  
518 Movements in the C57BL/6J Mouse. *Investig. Ophthalmology Vis. Sci.* 51, 623.
- 519 Belknap, D.B., and McCrea, R.A. (1988). Anatomical connections of the prepositus and abducens  
520 nuclei in the squirrel monkey. *J. Comp. Neurol.* 268, 13–28.
- 521 Belton, T., and McCrea, R.A. (2000). Role of the Cerebellar Flocculus Region in Cancellation of the  
522 VOR During Passive Whole Body Rotation. *J. Neurophysiol.* 84, 1599–1613.
- 523 Blazquez, P., Hirata, Y., and Highstein, S. (2004). The vestibulo-ocular reflex as a model system for  
524 motor learning: what is the role of the cerebellum? *The Cerebellum* 3, 188–192.
- 525 Büttner-Ennever, J.A., and Büttner, U. (1992). Neuroanatomy of the ocular motor pathways.  
526 *Baillières Clin. Neurol.* 1, 263–287.
- 527 Cannon, S.C., and Robinson, D.A. (1987). Loss of the neural integrator of the oculomotor system  
528 from brain stem lesions in monkey. *J. Neurophysiol.* 57, 1383–1409.
- 529 Cheron, G., Gillis, P., and Godaux, E. (1986a). Lesions in the cat prepositus complex: effects on the  
530 optokinetic system. *J. Physiol.* 372, 95–111.
- 531 Cheron, G., Godaux, E., Laune, J.M., and Vanderkelen, B. (1986b). Lesions in the cat prepositus  
532 complex: effects on the vestibulo-ocular reflex and saccades. *J. Physiol.* 372, 75–94.
- 533 Clopath, C., Badura, A., Zeeuw, C.I.D., and Brunel, N. (2014). A Cerebellar Learning Model of  
534 Vestibulo-Ocular Reflex Adaptation in Wild-Type and Mutant Mice. *J. Neurosci.* 34, 7203–7215.
- 535 Collewijn, H. (1969). Optokinetic eye movements in the rabbit: Input-output relations. *Vision Res.* 9,  
536 117–132.
- 537 Delgado-García, J.M. (2000). Why move the eyes if we can move the head? *Brain Res. Bull.* 52,  
538 475–482.
- 539 Faulstich, B.M., Onori, K.A., and du Lac, S. (2004). Comparison of plasticity and development of  
540 mouse optokinetic and vestibulo-ocular reflexes suggests differential gain control mechanisms.  
541 *Vision Res.* 44, 3419–3427.
- 542 Frens, M.A., and Donchin, O. (2009). Forward Models and State Estimation in Compensatory Eye  
543 Movements. *Front. Cell. Neurosci.* 3.

- 544 Gao, Z., van Beugen, B.J., and De Zeeuw, C.I. (2012). Distributed synergistic plasticity and  
545 cerebellar learning. *Nat. Rev. Neurosci.* *13*, 619–635.
- 546 Gerrits, N.M., Epema, A.H., and Voogd, J. (1984). The mossy fiber projection of the nucleus  
547 reticularis tegmenti pontis to the flocculus and adjacent ventral paraflocculus in the cat. *Neuroscience*  
548 *11*, 627–644.
- 549 Ghasia, F.F., Meng, H., and Angelaki, D.E. (2008). Neural Correlates of Forward and Inverse  
550 Models for Eye Movements: Evidence from Three-Dimensional Kinematics. *J. Neurosci.* *28*, 5082–  
551 5087.
- 552 Glasauer, S. (2007). Current models of the ocular motor system. *Dev. Ophthalmol.* *40*, 158–174.
- 553 Glickstein, M., Gerrits, N., Kralj-Hans, I., Mercier, B., Stein, J., and Voogd, J. (1994). Visual  
554 pontocerebellar projections in the macaque. *J. Comp. Neurol.* *349*, 51–72.
- 555 Graf, W., Simpson, J.I., and Leonard, C.S. (1988). Spatial organization of visual messages of the  
556 rabbit's cerebellar flocculus. II. Complex and simple spike responses of Purkinje cells. *J.*  
557 *Neurophysiol.* *60*, 2091–2121.
- 558 Green, A.M., Meng, H., and Angelaki, D.E. (2007). A Reevaluation of the Inverse Dynamic Model  
559 for Eye Movements. *J. Neurosci.* *27*, 1346–1355.
- 560 Haar, S., and Donchin, O. A revised computational neuroanatomy for motor control.
- 561 Haith, A., and Vijayakumar, S. (2007). Robustness of VOR and OKR adaptation under kinematics  
562 and dynamics transformations. In 2007 IEEE 6th International Conference on Development and  
563 Learning, pp. 37–42.
- 564 Jordan, M.I., and Rumelhart, D.E. (1992). Forward Models: Supervised Learning with a Distal  
565 Teacher. *Cogn. Sci.* *16*, 307–354.
- 566 Kawato, M., and Gomi, H. (1992). The cerebellum and VOR/OKR learning models. *Trends*  
567 *Neurosci.* *15*, 445–453.
- 568 Langer, T., Fuchs, A.F., Scudder, C.A., and Chubb, M.C. (1985). Afferents to the flocculus of the  
569 cerebellum in the rhesus macaque as revealed by retrograde transport of horseradish peroxidase. *J.*  
570 *Comp. Neurol.* *235*, 1–25.
- 571 Lisberger, S.G. (2009). Internal models of eye movement in the floccular complex of the monkey  
572 cerebellum. *Neuroscience* *162*, 763–776.
- 573 Lunn, D., Spiegelhalter, D., Thomas, A., and Best, N. (2009). The BUGS project: Evolution, critique  
574 and future directions. *Stat. Med.* *28*, 3049–3067.
- 575 McCrea, R.A., and Baker, R. (1985). Anatomical connections of the nucleus prepositus of the cat. *J.*  
576 *Comp. Neurol.* *237*, 377–407.
- 577 Oyster, C.W., Takahashi, E., and Collewijn, H. (1972). Direction-selective retinal ganglion cells and  
578 control of optokinetic nystagmus in the rabbit. *Vision Res.* *12*, 183–193.

- 579 Parrell, B., Ramanarayanan, V., Nagarajan, S., and Houde, J. (2019). The FACTS model of speech  
580 motor control: fusing state estimation and task-based control. *BioRxiv* 543728.
- 581 Porrill, J., and Dean, P. (2007). Cerebellar Motor Learning: When Is Cortical Plasticity Not Enough?  
582 *PLoS Comput Biol* 3, e197.
- 583 Porrill, J., Dean, P., and Stone, J.V. (2004). Recurrent cerebellar architecture solves the motor-error  
584 problem. *Proc. R. Soc. B Biol. Sci.* 271, 789–796.
- 585 Rambold, H., Churchland, A., Selig, Y., Jasmin, L., and Lisberger, S.G. (2002). Partial Ablations of  
586 the Flocculus and Ventral Paraflocculus in Monkeys Cause Linked Deficits in Smooth Pursuit Eye  
587 Movements and Adaptive Modification of the VOR. *J. Neurophysiol.* 87, 912–924.
- 588 Robinson, D.A. (1981). The Use of Control Systems Analysis in the Neurophysiology of Eye  
589 Movements. *Annu. Rev. Neurosci.* 4, 463–503.
- 590 Sağlam, M., Lehnen, N., and Glasauer, S. (2011). Optimal Control of Natural Eye-Head Movements  
591 Minimizes the Impact of Noise. *J. Neurosci.* 31, 16185–16193.
- 592 Sağlam, M., Glasauer, S., and Lehnen, N. (2014). Vestibular and cerebellar contribution to gaze  
593 optimality. *Brain* 137, 1080–1094.
- 594 Schonewille, M., Belmeguenai, A., Koekkoek, S.K., Houtman, S.H., Boele, H.J., van Beugen, B.J.,  
595 Gao, Z., Badura, A., Ohtsuki, G., Amerika, W.E., et al. (2010). Purkinje Cell-Specific Knockout of  
596 the Protein Phosphatase PP2B Impairs Potentiation and Cerebellar Motor Learning. *Neuron* 67, 618–  
597 628.
- 598 Schonewille, M., Gao, Z., Boele, H.-J., Vinueza Veloz, M.F., Amerika, W.E., Šimek, A.A.M.,  
599 De Jeu, M.T., Steinberg, J.P., Takamiya, K., Hoebeek, F.E., et al. (2011). Reevaluating the Role of  
600 LTD in Cerebellar Motor Learning. *Neuron* 70, 43–50.
- 601 Shadmehr, R., and Krakauer, J.W. (2008). A computational neuroanatomy for motor control. *Exp.*  
602 *Brain Res.* 185, 359–381.
- 603 Shin, S.-L., Zhao, G.Q., and Raymond, J.L. (2014). Signals and Learning Rules Guiding Oculomotor  
604 Plasticity. *J. Neurosci.* 34, 10635–10644.
- 605 Sibindi, T.M., Holland, P.J., van der Geest, J.N., Donchin, O., and Frens, M.A. (2016). Superposition  
606 Violations in the Compensatory Eye Movement System. *Investig. Ophthalmology Vis. Sci.* 57, 3554.
- 607 Sohmer, H., Elidan, J., Plotnik, M., Freeman, S., Sockalingam, R., Berkowitz, Z., and Mager, M.  
608 (1999). Effect of noise on the vestibular system - Vestibular evoked potential studies in rats. *Noise*  
609 *Health* 2, 41.
- 610 Soodak, R.E., and Simpson, J.I. (1988). The accessory optic system of rabbit. I. Basic visual response  
611 properties. *J. Neurophysiol.* 60, 2037–2054.
- 612 Stahl, J.S., and Simpson, J.I. (1995). Dynamics of abducens nucleus neurons in the awake rabbit. *J*  
613 *Neurophysiol* 73, 1383–1395.



- 614 Stahl, J.S., van Alphen, A.M., and De Zeeuw, C.I. (2000). A comparison of video and magnetic  
615 search coil recordings of mouse eye movements. *J. Neurosci. Methods* 99, 101–110.
- 616 Stahl, J.S., James, R.A., Oommen, B.S., Hoebeek, F.E., and Zeeuw, C.I.D. (2006). Eye Movements  
617 of the Murine P/Q Calcium Channel Mutant Tottering, and the Impact of Aging. *J. Neurophysiol.* 95,  
618 1588–1607.
- 619 Stahl, J.S., Thumser, Z.C., May, P.J., Andrade, F.H., Anderson, S.R., and Dean, P. (2015).  
620 Mechanics of mouse ocular motor plant quantified by optogenetic techniques. *J. Neurophysiol.* 114,  
621 1455–1467.
- 622 Takemori, S., and Cohen, B. (1974). Loss of visual suppression of vestibular nystagmus after  
623 flocculus lesions. *Brain Res.* 72, 213–224.
- 624 Todorov, E., and Jordan, M.I. (2002). Optimal feedback control as a theory of motor coordination.  
625 *Nat. Neurosci.* 5, 1226–1235.
- 626 Wakita, R., Tanabe, S., Tabei, K., Funaki, A., Inoshita, T., and Hirano, T. (2017). Differential  
627 regulations of vestibulo-ocular reflex and optokinetic response by  $\beta$ - and  $\alpha$ 2-adrenergic receptors in  
628 the cerebellar flocculus. *Sci. Rep.* 7, 3944.
- 629 Winkelman, B., and Frens, M. (2006). Motor Coding in Floccular Climbing Fibers. *J. Neurophysiol.*  
630 95, 2342–2351.
- 631 Yang, A., and Hullar, T.E. (2007). Relationship of Semicircular Canal Size to Vestibular-Nerve  
632 Afferent Sensitivity in Mammals. *J. Neurophysiol.* 98, 3197–3205.
- 633 Zee, D.S., Yamazaki, A., Butler, P.H., and Gucer, G. (1981). Effects of ablation of flocculus and  
634 paraflocculus of eye movements in primate. *J. Neurophysiol.* 46, 878–899.
- 635
- 636

637 **Table 1**

|            | Value        | Eq.                      | Meaning                                            | Is it critical? | How was it set?                                                                                    |
|------------|--------------|--------------------------|----------------------------------------------------|-----------------|----------------------------------------------------------------------------------------------------|
| $dt$       | 1 ms         |                          | Time step                                          |                 |                                                                                                    |
| $T_p$      | 0.5 sec      | 1, 2, 15, 17, 24, 33, 38 | Leaky integrator time constant for motor nuclei    | No              | (Stahl and Simpson, 1995; Stahl et al., 2015)                                                      |
| $T_v$      | 4 sec        | 3, 15                    | Low pass filter constant for the vestibular inputs | Yes             | Fit to data. Close to value found for actual vestibular afferents by Yang and Hullar 2007 (3 sec). |
| $\delta_v$ | 2 ms         | 5, 20                    | Vestibular sensory delay                           | No              |                                                                                                    |
| $a_v$      | 0.1          | 6, 16                    | Vestibular sensory noise proportionality constant  | No              | Middle of the stable range                                                                         |
| $R_{\max}$ | 0.65 deg/sec | 8                        | Retinal saturation                                 | Yes             | Oyster et al, 1972                                                                                 |
| $\delta_R$ | 70 ms        | 9, 20, 31                | Visual processing delay                            | Yes             | Van Alphen, 2001                                                                                   |
| $a_R$      | 0.1          | 10, 16                   | Visual sensory noise proportionality constant      | No              | Middle of the stable range.                                                                        |
| $a_u$      | 0.1          | 15, 16                   | Motor noise                                        | No              | Middle of the stable range                                                                         |

|                |                     |                         |                                                                                                                |    |                                                  |
|----------------|---------------------|-------------------------|----------------------------------------------------------------------------------------------------------------|----|--------------------------------------------------|
| $Z$            | -0.6                | 29,<br>33,<br>38,<br>48 | Assumed VOR inaccuracy                                                                                         | No | Fit to match VOR performance in the dark.        |
| $\kappa_V$     | 1                   | 22,<br>42               | Kalman gain of vestibular input                                                                                | No | Set so VOR is not eliminated by floccular lesion |
| $\kappa_T$     | 0.05                | 30,<br>42               | Kalman gain for the effect of retinal slip prediction error on assumed external motion (post-VOR retinal slip) | No | Fit to data                                      |
| $\kappa_{R,k}$ | 0.05                | 31,<br>35,<br>42        | Kalman gain for the effect of retinal slip prediction error on estimate of uncompensated retinal slip          | No | Fit to data                                      |
| $\gamma$       | $\frac{1}{e^{150}}$ | 44                      | Discount parameter for cost function                                                                           | No | Fit to produce credible drift in the dark        |
| $\theta$       | 2                   | 44                      | Weight of position factor in cost function                                                                     | No | Fit to produce credible drift in the dark        |
|                | 100,000             |                         | Number of terms kept in infinite cost function sum                                                             | No | Arbitrary                                        |

638

639 **Table 1.** Overview of all parameters used in the model, their values, the equations they are used  
640 (described in Supplementary Material), and a short description of their meaning. The last two columns  
641 describe whether they are critical, and how they were set. We determined how critical the parameters  
642 were, by varying them over an order of magnitude, and observing the changes in results.

643

## Supplementary Material

644 **Title:** A neuroanatomically grounded optimal control model of the compensatory eye movement  
645 system. Holland et al.

### 646 **1 Overview of Model**

647 This section describes the details of the model of the CEM described in the main text. The description  
648 provides all of the equations used in sufficient detail for the model to be implemented, although the  
649 actual Matlab code is available on the Open Science Framework website (<https://osf.io/feq7c/>). The  
650 model was implemented in Matlab R2016a (The MathWorks, Natick, MA). The time step for the  
651 simulation used was 1 ms.

652

653 This section is divided into subsections that describe the implementation of the plant and the control  
654 system. In the section on the plant, we describe both the effector and input implementations. The  
655 effector implementation is a model of how firing in the oculomotor nuclei affects muscle activation,  
656 and how that drives eye movement. The inputs we model are the vestibular and the retinal inputs to the  
657 system. The description of the control system is divided into three parts: the actual state dynamics; the  
658 system's estimate of state; and the transformation of state estimate into motor command.

#### 659 **1.1 The plant**

660 In this section we describe the dynamics of eye movement as a function of the firing rate of neurons in  
661 motor nuclei (OMN/AB) that project to eye muscles. Output of the OMN/AB innervates the horizontal  
662 rectus muscles, which are responsible for horizontal eye movements. These nuclei are reciprocally  
663 activated and project to muscles that move the eyes in opposite directions. Hence eye velocity depends

664 on the difference between OMN and AB activities. The transfer function of these nuclei for the monkey  
665 has been described using the formula (Robinson, 1981):

666 
$$T_p \dot{E} + E = Cu \quad (1)$$

667 (Where  $E$  is eye position,  $u$  is motor command from the OMN/AB, and  $C$  and  $T_p$  are the gain and  
668 time constants, respectively). The motor commands from the two nuclei were not separately modelled,  
669 but rather their activity was represented in a combined manner as the sum of two oppositely signed  
670 command signals.

671 Eq. (1) describes a leaky integrator with leakage time (in s). In monkey,  $T_p$  has been estimated at 0.24s  
672 and in rabbits it can be estimated from the work of Stahl and Simpson (1995) and more recently for  
673 mice in Stahl et al. (2015) to be 0.5s. We ran our simulation both with  $T_p = 0.24$  s and with  $T_p = 0.5$  s  
674 , and saw no difference in the results. For this paper, we present results using  $T_p = 0.5$  s (see Table 1).  
675 For the purpose of the model, we absorbed the constant  $C$  into the definition of  $u$  , so that our motor  
676 command was specified in °/s rather than in units of firing rate:

677

678 
$$\dot{E} = u - \frac{1}{T_p} E \quad (2)$$

679

## 680 **1.2 Sensory Signals**

681 Compensatory eye movements are driven by two different sensory signals – vestibular and retinal. In  
682 this section we describe the biological processes behind these sensory signals and the numerical models  
683 that can be used to describe them.

684

### 685 **1.3 Vestibular input**

686 Vestibular input is created by the semicircular canals in the inner ear. We transformed the head velocity  
687 to sensory signal in three steps: linear filtering, velocity-sensitive transformation, and delay. At high  
688 frequencies, canals sense head rotation velocity with high accuracy. However due to the physical  
689 properties of the sensor, the accuracy is not good at low frequencies

690 (Robinson, 1981). Thus, the semicircular canals can be best described as a high pass filter that acts  
691 on head velocity:

$$692 \quad \dot{V}^{(1)} = -\frac{1}{T_v} V^{(1)} + \dot{H} \quad (3)$$

693 Where  $V^{(1)}$  is the first stage of the neural signal generated by the velocity sensitive vestibular afferents  
694 (as opposed to  $V$ , the internal representation of head velocity) that are driven by the actual rotational  
695 head velocity,  $\dot{H}$ , and  $T_v$  is the filter constant that defines the effective sensitivity range of the  
696 afferents. The value of  $T_v$  differs between species. In mice this constant was measured in Yang and  
697 Hullar (2007). While they fit their data using a fairly complex transfer function (here reproduced in its  
698 original Laplace-domain notation):

$$699 \quad 0.09 \frac{3.0s}{(3.0s + 1)(0.007s + 1)} (0.2s + 1)^{0.03} \quad (4)$$

700 A first order approximation of the formula, and neglecting the leading constant, gives us Eq. (3). Over  
701 the relevant frequency range, the two functions are nearly identical, with  $T_v = 3\text{sec}$  for regular  
702 afferents of the horizontal semi-circular canal that project to the vestibular nucleus. Van Alphen et al.  
703 (2001) found that a lower time constant is needed to explain VOR experimental data. It is possible that  
704 additional filtering in the input synapses of the vestibular nucleus explains the difference between the

705 constant measured in the afferents and that seen behaviorally. However, we found that our behavioral  
706 data was best matched by a constant very close to that found by Yang and Hullar (2007),  $T_v = 4$  sec .

707 Subsequently, we introduced a delay and added noise:

708 
$$\dot{V}_k^+ = \dot{V}_{k-\delta_v}^{(1)} + n_{v,k} \quad (5)$$

709 The vestibular delay ( $\delta_v = 2$  ms) represents the physical response time of the semi-circular canal and  
710 the neuronal transmission delay (Sohmer et al., 1999) . The noise ( $n_{v,k}$ ) has a standard deviation  
711 proportional to the size of the vestibular signal (with constant of proportionality  $a_v$ , with the tilde,  $\sim$ ,  
712 meaning “distributes as” and  $N(\mu, \sigma^2)$  is the normal distribution with mean  $\mu$  and variance  $\sigma^2$ ):

713 
$$n_{v,k} \sim N(0, a_v^2 \dot{V}_k^2) \quad (6)$$

714 Since vestibular inputs depend only on head movement and head movement is determined by the  
715 experiment, the behavior of the system has no effect on vestibular inputs. Thus, we calculated these  
716 signals offline before running the simulations and introduced them directly as input.

### 717 **1.3.1 Retinal Input**

718 Visual information is provided by motion sensitive neurons in the retina (Yoshida et al., 2001). Those  
719 neurons sense local velocity of the image on the retina (often called retinal slip). In our experiments,  
720 the entire retina experiences the same retinal slip, and it is equal to:

721 
$$R_k = \dot{H}_k + \dot{E}_k - \dot{T}_k \quad (7)$$

722 Where  $R$  is retinal slip velocity, in  $^\circ/s$ ,  $\dot{T}$  the velocity of the visual surroundings in  $^\circ/s$ , and  $\dot{E}$  is the  
723 velocity of the eye relative to the head (generated as described above in Eq. (2)).

724 The retinal motion sensitive neurons are linear in a limited range. In rabbits, sensitivity peaks at about  
 725  $0.6^\circ/\text{s}$  (Oyster et al., 1972), with neuronal firing rates increasing through this range, but then dropping  
 726 off for higher velocities. At  $10^\circ/\text{s}$  the neurons are unresponsive. Neurons in the AOS (the retinal  
 727 target driving OKR) have shown similar properties (Soodak and Simpson, 1988). Currently available  
 728 data does not give the precise saturation point for the motion processing system of the mouse. In order  
 729 to fit our data, our model assumes saturation of  $R_{\max} = 0.65 \text{ deg/sec}$  and a piece-wise linear response  
 730 function, representing a population code of neurons that individually drop off at values between 0 and  
 731  $R_{\max}$ :

$$732 \quad h(R_k) = \begin{cases} R_k & -R_{\max} \leq R_k \leq R_{\max} \\ R_{\max} & R_k \geq R_{\max} \\ -R_{\max} & R_k \leq -R_{\max} \end{cases} \quad (8)$$

733 The processing of visual signals adds substantial delay to the retinal feedback (Collewijn, 1969). Our  
 734 model uses the value of  $\delta_R = 70 \text{ ms}$  proposed for the delay in mice (van Alphen et al., 2001) :

$$735 \quad R_{k-\delta_R}^+ = h(R_{k-\delta_R}) + n_{R,k} \quad (9)$$

736 With  $R_k^+$  the current internal representation of retinal slip, and  $n_{R,k}$  being the retinal noise, which has  
 737 standard deviation proportional to the retinal activation (with a constant of proportionality  $a_R^2$ ):

$$738 \quad n_{R,k} \sim N(0, a_R^2 R_k^2) \quad (10)$$

### 739 **1.3.2 Full system dynamics**

740 The above descriptions of the oculomotor plant and the retinal and vestibular input are combined to  
 741 make a nearly linear state equation for the plant. Thus, we use a standard linear systems formulation  
 742 (Frens and Donchin, 2009) with the state of the system at time  $k$ ,  $x_k$ , undergoing a particular dynamics  
 743 specified by the matrix  $A$ . In addition, the state is influenced by three factors: the command signal,  $u_k$



744 , affects the state through a matrix,  $B$  , that specifies how each part of the command signal influences  
 745 each element of the state; the external input,  $z_k$  , represents the influence of the external world on the  
 746 state; also, the state is influenced by noise,  $n_k$  . Finally, this state leads to sensory input (often called  
 747 the observation),  $y_k$  , through a matrix,  $D$  . Altogether, this leads to what is called the system equations:

$$748 \quad \begin{aligned} x_{k+1} &= Ax_k + Bu_k + z_k + n_k \\ y_k &= Dx_k \end{aligned} \quad (11)$$

749 These system equations are linear. Each piece of this equation is treated in detail in the paragraphs that  
 750 follow.

751 The state at time step  $k$  is represented by the following vector:

$$752 \quad x_k = [H_k \quad \dot{H}_k \quad V_k \quad E_{V,k} \quad \dot{E}_{V,k} \quad T_k \quad \dot{T}_k \quad E_{R,k} \quad \dot{E}_{R,k} \quad R_k \quad R_{k-1} \quad \dots \quad R_{k-70} \quad V_{k-1} \quad V_{k-2}] \quad (12)$$

753 The state includes time-delayed versions of the retinal and vestibular sensory signals.  $R_k$  represents  
 754 the retinal input being generated at this instant (based on the current eye velocity) and  $R_{k-1}$  through  
 755  $R_{k-70}$  represent increasingly delayed versions. The observation matrix, Eq. (20), is such that only the  
 756 fully delayed retinal slip,  $R_{k-70}$  , is available to the state estimation. The vestibular input is not affected  
 757 by the behavior of the system, so it was generated offline according to Eq. (3) and delayed by 2 ms  
 758 according to Eq. (5).

759  $z_k$  is the external input and includes the change in the actual head velocity, vestibular sensory signal,  
 760 and movement of the visual stimulus. These signals can all be generated offline before running the  
 761 simulation. The vector can be written as:

$$762 \quad z_k = [0 \quad \Delta \dot{H}_k \quad \Delta V_k \quad 0 \quad 0 \quad 0 \quad \Delta \dot{T}_k \quad 0 \quad 0 \quad 0 \quad 0 \quad 0 \quad \dots \quad 0 \quad 0 \quad 0 \quad 0] \quad (13)$$

763  $n_k$  is the noise in the system. It affects eye velocity as well as vestibular and retinal input, so it can be  
764 written as:

$$765 \quad n_k = [0 \quad 0 \quad n_v \quad 0 \quad n_u \quad 0 \quad 0 \quad 0 \quad n_u \quad n_R \quad 0 \quad 0 \quad \dots \quad 0 \quad 0 \quad 0 \quad 0] \quad (14)$$

766 In modelling the noise, we opted for model simplicity over realistic modelling of the noise. We  
767 followed the general idea in Todorov (2004) and Harris and Wolpert (1998) of having the size of the  
768 noise be proportional to the signal. Vestibular noise and retinal noise have already been described in  
769 Eqs. (6) and (10) respectively. The standard deviation of the motor noise is similarly proportional to  
770 the motor command (with constant of proportionality  $a_u$ )

$$772 \quad \dot{E}_{k+1} = u_k - \frac{1}{T_p} E_k + n_u$$
$$771 \quad n_u \sim N(0, a_u^2 u_k^2) \quad (15)$$

773 We ran the model with different constants of proportionality for the noise ( $a_u$ ,  $a_R$  and  $a_v$ ) up to 0.5  
774 and did not see a change in the results. Given that we have no available data on amount of sensory or  
775 motor noise in the system we used values well in the middle of stable range, i.e.:

$$776 \quad a_u = a_R = a_v = 0.1 \quad (16)$$

777  $A$  is the matrix describing the state dynamics and is written as:

778

$$A = \begin{bmatrix}
 1 & dt & 0 & 0 & 0 & 0 & 0 & 0 & 0 & 0 & 0 & \dots & 0 & 0 & 0 & 0 \\
 0 & 0 & 0 & 0 & 0 & 0 & 0 & 0 & 0 & 0 & 0 & \dots & 0 & 0 & 0 & 0 \\
 0 & 0 & 0 & 0 & 0 & 0 & 0 & 0 & 0 & 0 & 0 & \dots & 0 & 0 & 0 & 0 \\
 0 & 0 & 0 & 1 & dt & 0 & 0 & 0 & 0 & 0 & 0 & \dots & 0 & 0 & 0 & 0 \\
 0 & 0 & 0 & -\frac{1}{T_p} & 0 & 0 & 0 & 0 & 0 & 0 & 0 & \dots & 0 & 0 & 0 & 0 \\
 0 & 0 & 0 & 0 & 0 & 1 & dt & 0 & 0 & 0 & 0 & \dots & 0 & 0 & 0 & 0 \\
 0 & 0 & 0 & 0 & 0 & 0 & 0 & 0 & 0 & 0 & 0 & \dots & 0 & 0 & 0 & 0 \\
 0 & 0 & 0 & 0 & 0 & 0 & 0 & 1 & dt & 0 & 0 & \dots & 0 & 0 & 0 & 0 \\
 0 & 0 & 0 & 0 & 0 & 0 & 0 & -\frac{1}{T_p} & 0 & 0 & 0 & \dots & 0 & 0 & 0 & 0 \\
 0 & 1 & 0 & 0 & 1 & 0 & 1 & 0 & 1 & 0 & 0 & \dots & 0 & 0 & 0 & 0 \\
 0 & 0 & 0 & 0 & 0 & 0 & 0 & 0 & 0 & 1 & 0 & \dots & 0 & 0 & 0 & 0 \\
 0 & 0 & 0 & 0 & 0 & 0 & 0 & 0 & 0 & 0 & 1 & 0 & \dots & 0 & 0 & 0 \\
 \vdots & \ddots & \vdots & \vdots & \vdots & \vdots \\
 0 & 0 & 0 & 0 & 0 & 0 & 0 & 0 & 0 & 0 & 0 & \dots & 0 & 0 & 0 & 0 \\
 0 & 0 & 0 & 0 & 0 & 0 & 0 & 0 & 0 & 0 & 0 & \dots & 1 & 0 & 0 & 0 \\
 0 & 0 & 1 & 0 & 0 & 0 & 0 & 0 & 0 & 0 & 0 & \dots & 0 & 0 & 0 & 0 \\
 0 & 0 & 0 & 0 & 0 & 0 & 0 & 0 & 0 & 0 & 0 & \dots & 0 & 0 & 1 & 0
 \end{bmatrix} \tag{17}$$

779

780 Rows 2, 3 and 7 (velocity of the surroundings and of the head and the vestibular signal) are all just  
781 equal to 0. This reflects the fact that these variables are controlled by the inputs and not part of the  
782 dynamics of the system, in our model. Row 4 (eye position) simply includes the change in eye position  
783 caused by eye velocity (column 5), which needs to be scaled by  $d=0.001$  because eye velocity is in  
784 units of  $^{\circ}/s$  and the time step is 1 millisecond. It is worth noting that row 8 also describes eye dynamics  
785 (just like row 4). These representations are separated because in the internal controller they reflect  
786 different estimates. The simulation code keeps them in register by replacing them with the sum of the  
787 two values on each time step. Row 5 (and row 9) describe the tendency of the eye to drift back to center  
788 (the position dependent part of Eq. (2)). Row 10 says that current retinal slip is equal to head velocity  
789 plus eye velocity minus stimulus velocity (Eq. 7). The rest of the dynamics matrix (rows 13 through  
790 78, not shown) simply shifts previous measured retinal input backwards in time

791 (e.g.  $R_k \rightarrow R_{k-1}, R_{k-1} \rightarrow R_{k-2}$ ).

792 State transition is not, however, strictly linear. This non-linearity is represented by the function  $h(Ax_k)$

793 in Eq. (8) so that,

794 
$$h(Ax_{k+1}) = [H_k \quad \dot{H}_k \quad V_k \quad E_{V,k} \quad \dot{E}_{V,k} \quad T_k \quad \dot{T}_k \quad E_{R,k} \quad \dot{E}_{R,k} \quad h(R_k) \quad R_k \quad R_{k-1} \quad \dots \quad R_{k-69} \quad R_{k-70} \quad V_{k-1} \quad V_{k-2}] (18)$$

795 Where  $h(R)$  describes the saturation of the retinal sensory signal (Eq. (8)). That is, every element of

796 the state vector is preserved by  $h$  except the retinal slip which saturates.

797 Since the motor command,  $u_k$ , is a scalar, the control matrix  $B$  of Eq. (11) is a vector with the same

798 size as the state. Because the command affects eye velocity directly, the only non-zero element of  $B$  is

799 in the row representing eye velocity. Units are adjusted so that 1 unit of motor command (neural

800 activation) causes an acceleration of 1 °/ms, so  $B$  is:

801 
$$B = \begin{bmatrix} 0 & 0 & 0 & 0 & 1 & 0 & 0 & 0 & 0 & 0 & \dots & 0 & 0 \\ 0 & 0 & 0 & 0 & 0 & 0 & 0 & 0 & 1 & 0 & \dots & 0 & 0 \end{bmatrix} (19)$$

802 The second equation in Eq. (11) describes the observation, which is the part of the state available to

803 the controller. The observation vector,  $y_k$ , contains delayed retinal and vestibular inputs. Thus, it can

804 be calculated linearly using the observation matrix  $D$  (which is simply a 2x82 matrix of zeros with

805 ones at locations (1, 82) and (2, 80) for vestibular and retinal input respectively). The  $D$  matrix is

806 applied to the retinal slip after saturation, and we also add in sensory noise at this stage.

807 
$$y_k = Dh(x_k) + \eta = \begin{bmatrix} \dot{V}_{k-\delta_V} + \eta_V \\ h(R_{k-\delta_R}) + \eta_R \end{bmatrix}^T = \begin{bmatrix} \dot{V}_{k-\delta_V}^+ \\ R_{k-\delta_R}^+ \end{bmatrix}^T (20)$$

### 808 1.3.3 Control system

809 In this section we describe an optimal feedback controller for the compensatory eye movement system.

810 This controller includes a forward model and a process of combining forward model prediction with

811 sensory input, called state estimation. We will use the hat notation,  $\hat{x}$ , for estimates produced by the

812 forward model and the tilde notation,  $\tilde{x}$ , for the combined state estimate.

813 The operation of the controller can be described globally with the following equations:

$$\begin{aligned} \hat{x}_{k+1} &= A' \tilde{x}_k + B u_k \\ \tilde{x}_{k+1} &= \hat{x}_{k+1} + K (y_k - h(D' \hat{x}_{k+1})) \\ u_{k+1} &= -L \tilde{x}_{k+1} \end{aligned} \quad (21)$$

815 The first equation says that the forward model uses the previous state estimate and the previous motor

816 command to generate a prediction of the next state. The second equation says that the estimate of the

817 next state is generated by correcting this prediction for discrepancies between predicted and

818 experienced retinal slip. The last equation says that motor command will be a linear function of the

819 state. The tags on some symbols result from the fact that the controller's internal representation of state

820 is different from the actual system state. Thus,  $A'$  is the internal representation of system dynamics and

821  $D'$  selects the appropriate sensory inputs from the internal system state.

### 822 1.3.4 VOR control

823 Our model assumes, as described in the main text, that VOR and OKR involve separate neural

824 processing. Thus, it will be clearest if the operation of each is described separately, and then the

825 combined matrix equations will be easier to follow.

826 The architecture of the VOR is the same as the overall architecture of the system:

$$\begin{aligned}
 \hat{x}_{V,k+1} &= A'_V \tilde{x}_{V,k} + B_V u_{V,k} \\
 \tilde{x}_{V,k+1} &= \hat{x}_{V,k+1} + K_V (\dot{V}_k^+ - D'_V \hat{x}_{k+1}) \\
 u_{V,k+1} &= -L_V \tilde{x}_{V,k+1}
 \end{aligned} \tag{22}$$

828 In the case of VOR, since we have no access to the actual head velocity, we use the vestibular signal  
 829 as an approximation of the head velocity. Thus, the state needs only have five elements:

$$\hat{x}_{V,k} = \begin{bmatrix} \hat{H}_k & \hat{H}_k & \hat{V}_k & \hat{E}_{V,k} & \hat{E}_{V,k} \end{bmatrix} \tag{23}$$

831 The forward model is quite simple. The head velocity is not affected by either system dynamics or  
 832 command (row 1 of Eq. 24 and the first 0 in Eq. 25). Eye movements have the usual plant dynamics  
 833 (rows 4 and 5, which are taken from Eq. 2) and are affected directly by the motor command (the 1 in  
 834 the third fifth position of Eq. 25):

$$A'_V = \begin{bmatrix} 1 & dt & 0 & 0 & 0 \\ 0 & 1 & 0 & 0 & 0 \\ 0 & 1 & 0 & 0 & 0 \\ 0 & 0 & 0 & 1 & dt \\ 0 & 0 & 0 & -1/T_P & 0 \end{bmatrix} \tag{24}$$

$$B_V = [0 \ 0 \ 0 \ 0 \ 1] \tag{25}$$

837 The observation matrix returns the estimated head velocity (which is what we expect the vestibular  
 838 input to be):

$$D'_V = [0 \ 1 \ 0 \ 0 \ 0] \tag{26}$$

840 This is compared to the actual vestibular input,  $\dot{V}_k$ . Because a floccular lesion does not eliminate VOR  
 841 performance, we set  $K_V = [0 \ 1 \ 1 \ 0 \ 0]$ . That is, the sensory feedback completely replaces the

842 forward model in our knowledge of head velocity. The role of the forward model in this system is  
843 actually to integrate eye velocity into eye position.

844 Finally, the actual motor command is generated (see below for how these values are determined) using  
845 the equation  $u_{V,k+1} = -L_V \cdot \tilde{x}_V$  with  $L_V = [0 \ 0.972 \ 0 \ -1.77 \ 0.000233]$  so that, ultimately:

846 
$$u_{V,k+1} = -0.972\tilde{H}_{V,k} + 1.77\tilde{E}_{V,k} - 0.000233\tilde{E}_{V,k} \quad (27)$$

### 847 1.3.5 OKR control

848 The job of the second part of the control loop is to estimate uncompensated retinal slip and compensate  
849 for it. Uncompensated visual slip arises from three sources: changes in the velocity of the visual  
850 stimulus, noise in the system, and head movements not compensated by the VOR. Importantly, the  
851 system cannot distinguish changes in the velocity of the visual stimulus from noise in the system. We  
852 use the symbol  $\tilde{R}_k^*$  for the system's estimate of all three of these quantities together: the retinal slip  
853 uncorrected by VOR. We also call this the post-VOR slip, and it represents how much the visual  
854 environment would be moving in the absence of OKR.

855 The OKR's prediction of uncompensated retinal slip is thus the difference of two quantities: the post-  
856 VOR slip and the estimate of how much the OKR is moving the eye,  $\hat{E}_{R,k}$ :

857 
$$\hat{R}_k = \hat{E}_{R,k} - \tilde{R}_k^* \quad (28)$$

858 The OKR system assumes that some amount of head movement will be compensated for by the VOR.  
859 Its estimate of uncompensated visual input generated by sensed head velocity is proportional to the  
860 actual sensed head velocity. Our forward model estimate of uncompensated post-VOR retinal slip will  
861 be different from our previous estimate because it is updated by a factor proportional to head  
862 acceleration:

863 
$$\hat{R}_{k+1}^* = \tilde{R}_k^* + \zeta \left( \hat{H}_k - \hat{H}_{k-1} \right) \quad (29)$$

864 (where  $\zeta$  is the constant of proportionality and is discussed in the section on VOR adaptation below).

865 We then use a Kalman filter to incorporate sensory prediction error and produce a final estimate of  
866 post-VOR retinal slip:

867 
$$\tilde{R}_{k+1}^* = \hat{R}_{k+1}^* + K_{T,R_k} \left( R_{k-\delta_R}^+ - \tilde{R}_k \right) \quad (30)$$

868  $K_{T,R_k}$  represents the appropriate term in the Kalman gain matrix (specified fully below). Our data was  
869 best fit by using  $\zeta = -0.6$  and  $K_{T,R_k} = 0.05$  which means that that OKR has a tendency to  
870 overcompensate for head rotation and that it estimates that 5% of unexpected retinal slip represents  
871 real movement of the visual surroundings. Note that Eq. (30) also uses  $R_{k-\delta_R}^+$  and  $\tilde{R}_k$  which are the  
872 currently available retinal slip and its estimate while Eq. (28) and Eq (29) used  $\hat{R}_k^*$  which is the estimate  
873 of the retinal slip happening right now. This estimate will be delayed for 70 ms before it becomes  
874 available as  $\tilde{R}_k$  . For the ease of the reader a supplement to Figure 1 (Figure S1-figure supplement 1)  
875 includes a version of the model schematic with the various forms of retinal slip and its estimates  
876 labelled.

877 With this understanding in place, we can describe the OKR control system. It has the same overall  
878 architecture as the full system:

879 
$$\begin{aligned} \hat{x}_{R,k+1} &= A_R \tilde{x}_{R,k} + B_R u_{R,k} \\ \tilde{x}_{R,k+1} &= \hat{x}_{R,k+1} + K_{T,R_k} \left( R_{k-\delta_R+1}^+ - h(D_R \hat{x}_{R,k+1}) \right) \\ u_{R,k+1} &= -L_R \tilde{x}_{R,k+1} \end{aligned} \quad (31)$$

880 With function  $h$  representing the saturation of the retinal input (Eq. (8)). The state vector includes  
881 everything needed to calculate retinal slip, movement of the visual world, and head acceleration:



882 
$$\hat{x}_{R,k} = \begin{bmatrix} \hat{H}_k & \hat{H}_k & \hat{V}_k & \hat{T}_k & \hat{T}_k & \hat{E}_{R,k} & \hat{E}_{R,k} & \hat{R}_k^* & \hat{R}_k & \hat{R}_{k-1} & \cdots & \hat{R}_{k-69} & \hat{R}_{k-70} \end{bmatrix} \quad (32)$$

883 The forward dynamics matrix,  $A'_R$ , look like this:

884

885

886 
$$A'_R = \begin{bmatrix} 1 & dt & 0 & 0 & 0 & 0 & 0 & 0 & 0 & 0 & \cdots & 0 & 0 \\ 0 & 1 & 0 & 0 & 0 & 0 & 0 & 0 & 0 & 0 & \cdots & 0 & 0 \\ 0 & 1 & 0 & 0 & 0 & 0 & 0 & 0 & 0 & 0 & \cdots & 0 & 0 \\ 0 & 0 & 0 & 1 & dt & 0 & 0 & 0 & 0 & 0 & \cdots & 0 & 0 \\ 0 & \zeta & 0 & 0 & 0 & 0 & 0 & 0 & 0 & 0 & \cdots & 0 & 0 \\ 0 & 0 & 0 & 0 & 0 & 1 & dt & 0 & 0 & 0 & \cdots & 0 & 0 \\ 0 & 0 & 0 & 0 & 0 & -\frac{1}{T_p} & 0 & 0 & 0 & 0 & \cdots & 0 & 0 \\ 0 & \zeta & 0 & 0 & -1 & 0 & 0 & 1 & 0 & 0 & \cdots & 0 & 0 \\ 0 & 0 & 0 & 0 & 0 & 0 & 1 & 1 & 0 & 0 & \cdots & 0 & 0 \\ 0 & 0 & 0 & 0 & 0 & 0 & 0 & 0 & 1 & 0 & \cdots & 0 & 0 \\ \vdots & \ddots & \vdots & \vdots \\ 0 & 0 & 0 & 0 & 0 & 0 & 0 & 0 & 0 & 0 & \cdots & 0 & 0 \\ 0 & 0 & 0 & 0 & 0 & 0 & 0 & 0 & 0 & 0 & \cdots & 1 & 0 \end{bmatrix} \quad (33)$$

887 These rows accomplish: calculation of uncompensated post-VOR retinal slip (row 8, implementing Eq.  
888 (29)), shifting of current vestibular input to previous vestibular input (rows 4-5), modelling of the eye  
889 plant (rows 6-7, implementing Eq. (2)), calculation of the current uncompensated retinal slip (row 9,  
890 implementing Eq. (28)). The rest of the  $A'_R$  matrix takes care of the delay of the estimated retinal slip.

891 The  $B_R$  matrix simply copies the motor command into the eye velocity vector, just as with the VOR  
 892 system:

$$893 \quad B_R = [0 \ 0 \ 0 \ 0 \ 0 \ 0 \ 1 \ 0 \ 0 \ 0 \ \dots \ 0 \ 0] \quad (34)$$

894 In calculating state estimation for the OKR system, we must take into account the non-linearity of the  
 895 retinal processing before comparing the predicted retinal slip to the sensory input. We first use the  
 896 matrix  $D_R$  to select only the predicted uncompensated retinal slip,  $\hat{R}_{k-69}$ , from the state vector, as in Eq.  
 897 (26) but with a larger state vector. Then, the predicted uncompensated retinal slip is cut off with the  
 898 saturation function of the retinal input, as specified in Eq. (8). This can be compared to the true retinal  
 899 input  $R_{k-\delta R}^+$ , providing retinal slip prediction error. The retinal slip prediction error updates the  
 900 estimated state values of post-VOR retinal slip and uncompensated retinal slip. Our data was best fit  
 901 by using:

$$902 \quad K_R = [0 \ 0 \ 0 \ 0 \ 0 \ 0 \ 0 \ 0 \ 0.05 \ 0.05 \ \dots \ 0.05 \ 0.05] \quad (35)$$

903 Finally, the motor command is generated by using the equation  $u_{R,k+1} = -L_R \cdot \tilde{x}_R$  just like in the case  
 904 of VOR (again, see below for derivations), with  
 905  $L_R = [0 \ 0 \ 0 \ 0 \ 0 \ -1.77 \ 0.000233 \ 0.972 \ 0 \ 0 \ \dots \ 0 \ 0]$  so that the motor command is:

$$906 \quad u_{R,k+1} = -0.972 \tilde{R}_{R,k}^* + 1.77 \tilde{E}_{R,k} - 0.000233 \tilde{E}_{R,k} \quad (36)$$

### 907 **1.3.6 The combined controller: forward model**

908 To produce a combined system, as described in Eqs. (21), in our calculations we simply combine the  
 909 descriptions of the OKR and VOR systems above. The only state variable that overlaps in the two  
 910 systems is the head velocity. However, this poses no difficulties.

911 
$$\hat{x}_k = \begin{bmatrix} \hat{H}_k & \hat{H}_k & \hat{V}_k & \hat{E}_{V,k} & \hat{E}_{V,k} & \hat{T}_k & \hat{T}_k & \hat{E}_{R,k} & \hat{E}_{R,k} & \hat{R}_k^* & \hat{R}_k & \hat{R}_{k-1} & \cdots & \hat{R}_{k-69} & \hat{R}_{k-70} & \hat{V}_{k-1} & \hat{V}_{k-2} \end{bmatrix} \quad (37)$$

912 And the dynamics and command matrixes can be copied from the two systems described above (the  
913 last sets of rows just shift the retinal slip and vestibular input back in time):

914 
$$A' = \begin{bmatrix} 1 & dt & 0 & 0 & 0 & 0 & 0 & 0 & 0 & 0 & 0 & 0 & \cdots & 0 & 0 & 0 & 0 \\ 0 & 1 & 0 & 0 & 0 & 0 & 0 & 0 & 0 & 0 & 0 & 0 & \cdots & 0 & 0 & 0 & 0 \\ 0 & 1 & 0 & 0 & 0 & 0 & 0 & 0 & 0 & 0 & 0 & 0 & \cdots & 0 & 0 & 0 & 0 \\ 0 & 0 & 0 & 1 & dt & 0 & 0 & 0 & 0 & 0 & 0 & 0 & \cdots & 0 & 0 & 0 & 0 \\ 0 & 0 & 0 & -1/Tp & 0 & 0 & 0 & 0 & 0 & 0 & 0 & 0 & \cdots & 0 & 0 & 0 & 0 \\ 0 & 0 & 0 & 0 & 0 & 1 & dt & 0 & 0 & 0 & 0 & 0 & \cdots & 0 & 0 & 0 & 0 \\ 0 & \zeta & 0 & 0 & 0 & 0 & 0 & 0 & 0 & 0 & 0 & 0 & \cdots & 0 & 0 & 0 & 0 \\ 0 & 0 & 0 & 0 & 0 & 0 & 0 & 1 & dt & 0 & 0 & 0 & \cdots & 0 & 0 & 0 & 0 \\ 0 & 0 & 0 & 0 & 0 & 0 & 0 & -1/Tp & 0 & 0 & 0 & 0 & \cdots & 0 & 0 & 0 & 0 \\ 0 & \zeta & 0 & 0 & 0 & 0 & -1 & 0 & 0 & 1 & 0 & 0 & \cdots & 0 & 0 & 0 & 0 \\ 0 & 0 & 0 & 0 & 0 & 0 & 0 & 0 & 1 & 1 & 0 & 0 & \cdots & 0 & 0 & 0 & 0 \\ 0 & 0 & 0 & 0 & 0 & 0 & 0 & 0 & 0 & 0 & 1 & 0 & \cdots & 0 & 0 & 0 & 0 \\ \vdots & \ddots & \vdots & \vdots & \vdots & \vdots \\ 0 & 0 & 0 & 0 & 0 & 0 & 0 & 0 & 0 & 0 & 0 & 0 & \cdots & 0 & 0 & 0 & 0 \\ 0 & 0 & 0 & 0 & 0 & 0 & 0 & 0 & 0 & 0 & 0 & 0 & \cdots & 1 & 0 & 0 & 0 \\ 0 & 1 & 0 & 0 & 0 & 0 & 0 & 0 & 0 & 0 & 0 & 0 & \cdots & 0 & 0 & 0 & 0 \\ 0 & 0 & 0 & 0 & 0 & 0 & 0 & 0 & 0 & 0 & 0 & 0 & \cdots & 0 & 0 & 1 & 0 \end{bmatrix} \quad (38)$$

915 The internal representation of the command is two dimensional, with separate command for the VOR  
916 (dimension 1) and OKR (dimension 2), and each is added into the appropriate eye velocity:

917

918 
$$B' = \begin{bmatrix} 0 & 0 & 0 & 0 & 1 & 0 & 0 & 0 & 0 & 0 & 0 & 0 & 0 & 0 & 0 & 0 & 0 \\ 0 & 0 & 0 & 0 & 0 & 0 & 0 & 0 & 0 & 1 & 0 & 0 & 0 & 0 & 0 & 0 & 0 \end{bmatrix} \quad (39)$$

919 **1.3.7 The combined controller: state estimation**

920 In the second equation of the set in Eq. (21), the observation matrix,  $D'$ , selects the vestibular and  
 921 retinal input appropriately:

$$922 \quad D' = \begin{bmatrix} 0 & 1 & 0 & 0 & 0 & 0 & 0 & 0 & 0 & 0 & 0 & 0 & \cdots & 0 & 0 & 0 & 0 \\ 0 & 0 & 0 & 0 & 0 & 0 & 0 & 0 & 0 & 0 & 0 & 0 & \cdots & 0 & 1 & 0 & 0 \end{bmatrix} \quad (40)$$

923 Note that the first row of  $D'$  is different than the first row of  $D$ . This difference comes from the fact  
 924 that the internal system maintains an ongoing estimate of head velocity that is influenced by the input  
 925 while the real system does not maintain such an ongoing estimate. The only representation of the  
 926 delayed head velocity is the actual delayed head velocity.  $h'(x)$  applies the retinal saturation non-  
 927 linearity,  $h(R)$  from Eq. (8), to the retinal slip and does not change the vestibular input:

$$928 \quad h' \begin{pmatrix} \hat{H} \\ \hat{R} \end{pmatrix} = \begin{pmatrix} \hat{H} \\ h(\hat{R}) \end{pmatrix} \quad (41)$$

929 Parameters of the Kalman gain were selected by hand to match the data. We assumed that vestibular  
 930 input only affects our estimate of the head velocity,  $\tilde{H}$ , and that retinal input affects both our estimate  
 931 of post-VOR retinal slip,  $\tilde{R}_k^*$ , and our estimate of overall uncompensated retinal slip  $\tilde{R}_k$  and its delayed  
 932 versions. This gave the Kalman gain matrix the following form:

$$933 \quad K = \begin{bmatrix} 0 & \kappa_v & \kappa_v & 0 & 0 & 0 & 0 & 0 & 0 & 0 & 0 & 0 & \cdots & 0 & 0 & 0 & 0 \\ 0 & 0 & 0 & 0 & 0 & 0 & 0 & 0 & 0 & \kappa_T & \kappa_{R,k} & \kappa_{R,k} & \cdots & \kappa_{R,k} & \kappa_{R,k} & 0 & 0 \end{bmatrix} \quad (42)$$

934 We set  $\kappa_v$  to 1, in order match the experimental finding that floccular lesion does not eliminate VOR.

935 We set the other values to match the behavioral data. That is, the larger the value of  $\kappa_T$  and  $\kappa_{R,k}$ , the  
 936 more quickly new retinal input affects our estimates. When the Kalman gains for the visual system are  
 937 too large, noise reverberates in the system, leading to an explosion of noise in the OKR at low

938 frequencies. When they are too low, the system does not manage visual following. Balancing these two  
 939 considerations, we got the best match for our data with  $\kappa_T = \kappa_{R,k} = \kappa_{R,69} = \kappa_{R,68} = \dots = \kappa_{R,1} = \kappa_{R,0} = 0.05$   
 940 .

### 941 **1.3.8 The combined controller: cost function**

942 We assumed that the primary goal of the optimal controller of the CEM in afoveate species (like rabbit  
 943 and mouse) is to minimize motion of the visual field on the retina in order to stabilize the retinal image.  
 944 We make the assumption that this cost is considered separately for VOR and OKR because we are  
 945 assuming that these reflexes are supported by separate neural substrates.

946 Thus, the overall cost of the system can be broken down into two parts, vestibular and retinal:

$$947 \quad C = C_v + C_R \quad (43)$$

948 Each of the two sub costs is concerned with a different retinal slip:  $C_v$  relates to  $\tilde{H}_k + \tilde{E}_{v,k}$ , retinal slip  
 949 due to uncompensated head motion, while  $C_R$  relates to  $\tilde{R}_k^* + \tilde{E}_{R,k}$ , retinal slip due to uncompensated  
 950 motion of the visual environment. In addition to the cost associated with retinal slip, each cost function  
 951 includes a cost associated with eye eccentricities (this can be considered an “action” cost since eye  
 952 eccentricity leads to extra muscle activity and energy expenditure). Finally, both cost functions  
 953 discount future costs, as is common for an infinite horizon feedback controller: Thus, the two cost  
 954 functions required for creating the two motor commands are:

$$955 \quad C_v = \sum_{k=0}^{\infty} \gamma^{-k} \left( \left( \dot{E}_{v,k} + \dot{H}_k \right)^2 + \theta E_{v,k}^2 \right)$$

$$C_R = \sum_{k=0}^{\infty} \gamma^{-k} \left( \left( \dot{E}_{R,k} + R_k^* \right)^2 + \theta E_{R,k}^2 \right) \quad (44)$$

956 The parameter  $\theta$  balances between eccentricity and retinal slip costs. The parameter  $\gamma$  is the discount  
957 parameter Bradtke (1993) used to reduce the influence of increasingly distant costs. These two  
958 parameters were needed to match the drift of the eyes in the dark and were set to  $\theta = 2$  and  $\gamma = e^{-\frac{1}{150}}$ .  
959 For simplicity we approximated the infinite sum in Eq. (44) with a finite sum; we kept the first 100,000  
960 terms.

### 961 **1.3.9 The combined controller: the motor command**

962 If our system had a linear plant (L), quadratic cost function (Q) and independent, identically distributed  
963 (i.i.d.) Gaussian noise, it would be called an LQR system (Åström and Murray, 2008). For such  
964 systems, it can be proven that the optimal controller can be separated in two independent parts – an  
965 observer and a simple controller – using the Ricatti equations (Lancaster and Rodman, 1995). We do  
966 not go into the details of these equations here, but we note that the CEM system, as described above,  
967 is not linear (because of non-linearities in the inputs) and does not have i.i.d. noise (since we use signal  
968 dependent noise). Nevertheless, the convenience of the LQR formulas has led to their frequent use in  
969 systems that are close to being LQR (Burns and Ou, 1994; Lopez-Martinez et al., 2004). Previous  
970 experience is that this leads to nearly optimal controllers, and we followed this strategy here.

971 However, before we apply Ricatti equations, we make one additional assumption. We assume that for  
972 the purposes of this solution, the controller assumes full correction of the head velocity by the VOR  
973 system. That is, we set  $\zeta = 0$  in the matrix  $A'$ , Eq. (38).

974 Applying the equations of Lancaster and Rodman (1995) to our system, Eq. (21), we derive a solution  
975 for the control policy,  $L$ .

$$976 \quad L = \begin{bmatrix} 0 & 0.972 & 0 & -1.77 & 0.000233 & 0 & 0 & 0 & 0 & 0 \\ 0 & 0 & 0 & 0 & 0 & 0 & 0 & -1.77 & 0.000233 & 0.972 \end{bmatrix} \quad (45)$$

977 This can be more clearly written in terms of the final results for the motor commands:

$$\begin{aligned}
 978 \quad u_{R,k+1} &= -0.972\tilde{R}_{R,k}^* + 1.77\tilde{E}_{R,k} - 0.000233\tilde{E}_{R,k} \\
 979 \quad u_{V,k+1} &= -0.972\tilde{H}_{V,k} + 1.77\tilde{E}_{V,k} - 0.000233\tilde{E}_{V,k} \quad (46)
 \end{aligned}$$

980 The first term in both Eqs (46) compensates for retinal slip. The second term combines compensation  
 981 for the "drift to center" generated by the elastic properties of the plant (Eq.(2)). This activity is  
 982 apparently generated by the "neural integrator" produced by the firing of the tonic and burst-tonic  
 983 premotor cells (Robinson, 1981). Experimental results presented in this article and in other works  
 984 (Cannon and Robinson, 1987) show the elastic properties of the plant are not fully compensated for by  
 985 the controller; i.e. the neural integrator is leaky, and this leakage has a much higher time constant than  
 986 the elastic term of the plant.

### 987 1.3.10 VOR adaptation

988 The parameter  $\zeta$  (introduced in Eq.(29)) represents the extent to which the OKR system assumes head  
 989 movements will go uncompensated. We model CEM adaptation as adaptation of this parameter so as  
 990 to accurately predict retinal slip. The forward model prediction of retinal slip is given by Eq. (28).  
 991 Where we recall that the star indicates that this is the estimate of the retinal slip that is we predict that  
 992 is happening right now (post-VOR slip), as opposed to the estimate of the available retinal slip (with a  
 993 70 ms delay) which is indicated by  $\hat{R}_k$ .

994 We want to minimize the error in retinal slip prediction error (Figure 1-figure supplement 1):

$$995 \quad Z_{R,k} = R_{k-70}^+ - h(\tilde{R}_{k-70}) \quad (47)$$

996 We employ a decorrelation approach to adaptation (Porrill et al., 2013) and update  $\zeta$  based on a factor  
 997 proportional to the correlation of head acceleration and retinal slip prediction error.

998 
$$\zeta_{\text{new}} = \zeta_{\text{old}} - \eta * Z_{R,k} \left( \hat{H}_{k-1} - \hat{H}_{k-2} \right) \quad (48)$$

999 Where  $\eta$  specifies the rate of adaptation. For the results presented here  $\zeta$  was updated every 4 cycles  
1000 of the stimulus (although this value is not critical and adaptation functions correctly with a wide range  
1001 of update schedules) and was set to match the rate of adaptation in the experimental data:  $\eta = 0.018$ .

## 1002 **Experimental Methods**

### 1003 **1.4 Animals**

1004 In order to test the model we recorded CEM in 13 C57Bl/6J mice (Charles River, Wilmington, MA,  
1005 USA). All mice were housed on a 12h light / 12h dark cycle with unrestricted access to food and water.  
1006 Experiments were performed during their light phase. All experiments were performed with approval  
1007 of the local ethics committee and were in accordance with the European Communities Council  
1008 Directive (86/609/EEC).

### 1009 **1.5 Surgery**

1010 Animals were prepared for head fixation by attaching two metal nuts to the skull using a construct  
1011 made of a micro glass composite. The full procedure is described in van Alphen et al. (2009). Mice  
1012 were given at least 3 days following surgery to recover before the start of any experimental paradigm.

### 1013 **1.6 Stimulus setup**

1014 Optokinetic stimuli were created using a modified Electrohome Marquee 9000 CRT projector (Christie  
1015 Digital Systems, Cypress CA, USA) with a spatial resolution of at least 0.1 degrees and a temporal  
1016 resolution of 0.01 s. The average luminance was kept constant at 17.5 cd/m<sup>2</sup>. The stimuli were  
1017 projected via mirrors onto three transparent anthracite-colored screens (156\*125 cm), which were



1018 placed in a triangular formation around the recording setup (Fig 2A). This created a green monochrome  
1019 panoramic stimulus fully surrounding the animal. The stimuli were programmed in C++ and rendered  
1020 in OpenGL. They each consisted of 1592 green dots (2 degrees diameter) equally spaced on a virtual  
1021 sphere with its center at eye height above the center of the table. Moving stimuli were generated by  
1022 rotating the virtual sphere around its vertical axis in sinusoidal patterns of different frequency and  
1023 amplitude, so that all the dots moved coherently and in phase.

1024

1025 Vestibular stimulation was given by means of a motorized (Mavilor-DC motor 80, Mavilor Motors  
1026 S.A., Barcelona, Spain) vestibular table that had its axis aligned with the center of the visual stimulus.  
1027 The driving signal of both the visual and vestibular stimulation, which specified the required position,  
1028 was computed and delivered by a CED Power1401 data acquisition interface (Cambridge Electronic  
1029 Design, Cambridge, UK) with a resolution of 0.1 ° and 0.01 s.

### 1030 **1.7 Eye movement recordings**

1031 Mice were immobilized by placing them in a plastic tube, with the head pedestal bolted to a restrainer  
1032 that allowed translations in three dimensions such that the eye of the mouse was placed in the center  
1033 of the visual stimulus and thus above the rotation axis of the turn table, in front of the eye position  
1034 recording camera.

1035

1036 Eye movements were recorded with an infrared video system (Iscan ETL-200, Iscan, Burlington, MA,  
1037 USA). Images of the eye were captured at 120 Hz with an infrared sensitive CCD camera [see van  
1038 Alphen et al. (2009) for more details]. To keep the field of view as free from obstacles as possible, the  
1039 camera and lens were mounted under the table surface, and recordings were made with a hot mirror  
1040 that was transparent to visible light and reflective to infrared light (Fig. 2B). The eye was illuminated

1041 with two infrared LEDs at the base of the hot mirror. The camera, mirror and LEDs were all mounted  
1042 on an arm that could rotate about the vertical axis over a range of 26.1° (peak to peak). Eye movement  
1043 recordings and calibration procedures were similar to those described by Stahl et al. (2000). Eye  
1044 position was stored, along with the stimulus traces on hard disk for offline analysis.

## 1045 **1.8 Experimental Paradigms**

### 1046 **1.8.1 Optokinetic Reflex**

1047 The OKR (N=9) was tested using visual stimuli, while the mouse was kept stationary. We presented  
1048 sinusoidal stimuli containing a wide range of frequencies (0.1, 0.2, 0.4, 0.8, 1.6 and 3.2 Hz) and  
1049 amplitudes (0.5, 1.0, 2.0, 4.0, 6.0 and 8.0°), all about the earth vertical axis.

### 1050 **1.8.2 Vestibulo-ocular Reflex**

1051 The VOR (N=9) was tested with vestibular stimulation in the dark. Stimulus amplitudes and  
1052 frequencies were identical to those used for the OKR, except that stimuli with a peak velocity higher  
1053 than 60 °/s were discarded, because of mechanical considerations. Again, only rotations about the  
1054 vertical axis were made.

### 1055 **1.8.3 Visually enhanced VOR and suppressed VOR**

1056 The vVOR (N=9) and the sVOR (N=6) protocols were identical to the VOR stimulation, except for the  
1057 visual stimulation. During vVOR the visual stimulus was on, but stationary; during sVOR the visual  
1058 stimulus was on and moved in phase and at the same amplitude as the turn table.

1059

1060 These four stimulus protocols were presented blockwise in 1 or 2 experimental sessions. Within each  
1061 protocol the stimulus conditions were presented in random order to prevent effects of either learning  
1062 or fatigue. All stimuli were presented for at least 5 cycles. The other protocols were performed  
1063 separately.

#### 1064 **1.8.4 Non-periodic stimulation**

1065 For non-periodic stimulation we opted to give Sum-of-Sine (SoS) stimuli. In these SoS conditions, the  
1066 two constituent frequencies were chosen that had no harmonic relation. Four SoS frequency  
1067 combinations were used in this study: 0.6/0.8 Hz, 0.6/1.0 Hz, 0.8/1.0 Hz and 1.0/1.9 Hz. Amplitude  
1068 was either one or two degrees for each frequency component. Either both frequencies had the same  
1069 amplitude (both 1° or both 2°) or they had different amplitude (one at 1° and the other at 2°). This led  
1070 to a total of 24 types of stimuli in each of the OKR, VOR, vVOR and sVOR SoS conditions.  
1071 8 mice were used in this paradigm and they all performed all conditions.

#### 1072 **1.8.5 Drift in the dark**

1073 In order to compute the plant time constant (see Supplementary Material, eq 15), we needed the  
1074 mouse eye to drift in the dark from an eccentric position to the center of the oculomotor range. To do  
1075 so, a visual scene moved slowly horizontal, thus making the eye move eccentrically. Subsequently,  
1076 the light was turned off, and the mouse was in complete darkness. We then recorded the drift of the  
1077 eye towards the center. By fitting an exponential function to this drift, the plant time constant was  
1078 calculated. 6 mice were measured over a range of drift amplitudes between 4 and 10 degrees, the  
1079 number of drift repetitions was on average around 6 per amplitude per mouse.

#### 1080 **1.8.6 VOR adaptation**

1081 VOR gain down adaptation (N=7) experiments consisted of 6 testing sessions and 5 training trials.  
1082 Duration of each testing / training trial was 60s / 300s respectively. Sinusoidal (1 Hz, 5°) vestibular  
1083 stimulation was applied in the dark for the testing sessions. During training sessions vestibular  
1084 stimulation was accompanied by optokinetic sinusoidal stimulation of the same amplitude, phase and  
1085 frequency (thus resulting in a stable head fixed visual surrounding).

#### 1086 **1.9 Data Analysis**

1087 The Matlab (Matlab; The MathWorks, Natick, MA) code required for replication of the analysis  
1088 presented in this paper is available on the Open Science Framework website (<https://osf.io/feq7c/>).  
1089 Measured eye responses were analyzed offline. Position signals were transformed into velocity signals  
1090 by a Savitski-Golay differentiating filter (cut-off frequency 50 Hz with a 3° polynomial) and were then  
1091 smoothed with a median Gaussian filter (width 50 ms). Nystagmus fast phases and saccades were  
1092 removed with a velocity threshold of 150°/s and with an FIR Butterworth low pass filter optimized to  
1093 the stimulus frequency (cutoff at 3x stimulus frequency). There were two primary outcome measures  
1094 in this study: gain and phase.

1095 Gain and phase was extracted from the sinusoidal data by fitting a sinusoid and then using the gain and  
1096 phase of the fit. The fit was done using a hierarchical Bayesian analysis using OpenBugs (Version  
1097 3.2.3, <http://www.openbugs.net>, [Lunn et al., 2009]). The precise details of the model used, as well as  
1098 the parameters supplied to the OpenBugs algorithm, are provided below. In brief, the data for each trial  
1099 for each mouse was assumed to be the result of a specific gain and phase specific to that trial, generated  
1100 according to a distribution of gains and phases that were specific to the mouse. This distribution was,  
1101 itself, generated according to hyper-parameters that characterize the population of mice. In addition,  
1102 the noise in each trial was the result of a noise distribution characteristic of the mouse, which was  
1103 generated according to hyper-parameters that characterized the population. Because our data was  
1104 messy -- some mice had far more noise than others and some mice provided much more stable  
1105 recording of eye movements than others -- the Bayesian approach allowed to incorporate all of the data  
1106 in a robust manner, discounting the noisy or incomplete data when making estimates of the population  
1107 parameters. Ultimately, we show the 95% high density intervals for the gain and phase of the individual  
1108 mice in the bode plots (Figures 3-6B).

1109 In order to summarize the mouse population in Figures 3-6A we generated 10,000 samples of posterior  
1110 predictive mice. That is, for each of the 10,000 Bayesian samples, we selected an amplitude and phase  
1111 according to the parameters for the mouse population, and then used that amplitude and phase to  
1112 generate sinusoidal data. We used these 10,000 'typical' mouse sinusoids to define a region of typical  
1113 behavior. We characterized this region using the mean and standard deviation of these movements at  
1114 each time step.

1115 To summarize the similarity of the model response and the mouse population as a single value for

1116 each stimulus condition we employed Z-scores. Using the typical behavior we then calculated a Z-  
1117 score by subtracting the model response at each time point from the center of the region of typical  
1118 behavior and dividing by the standard deviation. This Z-score was then averaged across time points  
1119 for each condition.

1120 For the non-periodic data, gain and phase information were obtained by fitting two sine waves to the  
1121 stimuli and the data in custom-made Matlab curve fitting routines using the least squares method.

1122

1123 For all experiments the fits of the sine waves to the eye movement data provided the amplitude and  
1124 phase of the eye movements. The gain was calculated as the ratio of the amplitude of eye movement  
1125 compared to the amplitude of the stimulus, phase was calculated by subtracting the phase of the  
1126 stimulus from the movement. Thus, a positive phase value indicates a leading eye position signal.

## 1127 **Statistics**

1128 Our statistics are geared to test whether the model behaves “similarly” to a typical mouse. This is  
1129 different from the standard statistical test for effects and is also different from newly developed  
1130 procedures that test for equivalence. We chose to test the confidence with which we could claim that  
1131 model behavior lay within a “region of typical behavior” defined as the region within which 95% of  
1132 mice are likely to fall. Thus, our p values represent the confidence with which we can make this  
1133 statement.

1134 For each condition, the gain and the phase of the model’s behavior were compared to the posterior  
1135 predictive distribution of gains and phases of the mice. That is, for each Bayesian sample, we took  
1136 the population mean and the population standard deviation for the gain. This gave us, for each  
1137 Bayesian sample, an estimate of the mouse typical parameter value, from the mean minus 1.96 times  
1138 the population standard deviation to the mean plus 1.96 times the population standard deviation. We  
1139 determined the percentage of samples for which the value of the gain in the model lay within this  
1140 typical region. We used this as a measure of the posterior predictive probability that our model gain  
1141 was similar to those of a typical mouse. We used an identical procedure for the phase.

## 1142 **Bayesian Fitting Procedure**

1143 The gains and phases of the single sine experimental data were estimated using a Bayesian fitting  
1144 procedure using OpenBugs (version 3.2.3). The model used is specified in full form below:

```
1145 model{  
1146     for( rat in 1 : n.Rats ) {  
1147         for( bin in 1 : n.Bins ) {
```

```
1148         for( rep in 1 : n.Reps ) {
1149             Vel[rep , bin , rat] ~ dnorm(sint[bin , rat], tau.Vel.rat[rat])
1150         }
1151         sint[bin , rat] <- A.rat[rat] * sin(w * dT * bin - phi.rat[rat])
1152     }
1153     A.rat[rat] ~ dnorm(A.mu, A.tau)C(0,)
1154     phi.rat[rat] ~ dnorm(phi.mu, phi.tau)C(-π,π)
1155     tau.Vel.rat[rat] ~ dgamma(tau.Vel.shape, tau.Vel.scale)
1156 }
1157 A.mu ~ dunif(A.mu.lower, A.mu.upper)
1158 A.tau ~ dgamma(A.tau.shape, A.tau.scale)
1159 phi.mu ~ dnorm(phi.mu.mu, phi.mu.tau)C(-π,π)
1160 phi.tau ~ dgamma(phi.tau.shape, phi.tau.scale)
1161 }
```

1162 The fitting procedure was run with a burn-in of 500 samples, and then actual sampling of 10,000  
1163 samples in each of 3 chains. The initial values of the amplitude and phase of the fits were estimated  
1164 from the data and each chain was initialized with a different precision (an order of magnitude between  
1165 each). Convergence was assessed by manual inspection of the overlap of the chains and of the  
1166 smoothness and overlap of the histograms for the posterior distribution of each parameter.

1167

## 1168 **References**

- 1169 van Alphen, A.M., Stahl, J.S., and De Zeeuw, C.I. (2001). The dynamic characteristics of the  
1170 mouse horizontal vestibulo-ocular and optokinetic response. *Brain Res.* *890*, 296–305.
- 1171 van Alphen, B., Winkelman, B.H.J., and Frens, M.A. (2009). Age- and Sex-Related Differences in  
1172 Contrast Sensitivity in C57Bl/6 Mice. *Investig. Ophthalmology Vis. Sci.* *50*, 2451.
- 1173 Åström, K.J., and Murray, R.M. (2008). *Feedback Systems: An Introduction for Scientists and*  
1174 *Engineers* (Princeton, NJ: Princeton University Press).
- 1175 Bradtke, S.J. (1993). Reinforcement Learning Applied to Linear Quadratic Regulation. In In  
1176 *Advances in Neural Information Processing Systems 5*, (Morgan Kaufmann), pp. 295–302.
- 1177 Burns, J.A., and Ou, Y.-R. (1994). Feedback control of the driven cavity problem using LQR  
1178 designs. In , *Proceedings of the 33rd IEEE Conference on Decision and Control, 1994*, pp. 289–  
1179 294 vol.1.
- 1180 Cannon, S.C., and Robinson, D.A. (1987). Loss of the neural integrator of the oculomotor system  
1181 from brain stem lesions in monkey. *J. Neurophysiol.* *57*, 1383–1409.
- 1182 Collewijn, H. (1969). Optokinetic eye movements in the rabbit: Input-output relations. *Vision*  
1183 *Res.* *9*, 117–132.
- 1184 Frens, M.A., and Donchin, O. (2009). Forward models and state estimation in compensatory eye  
1185 movements. *Front. Cell. Neurosci.* *3*, 13.
- 1186 Harris, C.M., and Wolpert, D.M. (1998). Signal-dependent noise determines motor planning.  
1187 *Nature* *394*, 780–784.
- 1188 Lancaster, P., and Rodman, L. (1995). *Algebraic Riccati Equations* (Clarendon Press).
- 1189 Lopez-Martinez, M., Diaz, J.M., Ortega, M.G., and Rubio, F.R. (2004). Control of a laboratory  
1190 helicopter using switched 2-step feedback linearization. In *American Control Conference, 2004.*  
1191 *Proceedings of the 2004*, pp. 4330–4335 vol.5.
- 1192 Lunn, D., Spiegelhalter, D., Thomas, A., and Best, N. (2009). The BUGS project: Evolution,  
1193 critique and future directions. *Stat. Med.* *28*, 3049–3067.
- 1194 Oyster, C.W., Takahashi, E., and Collewijn, H. (1972). Direction-selective retinal ganglion cells  
1195 and control of optokinetic nystagmus in the rabbit. *Vision Res.* *12*, 183–193.
- 1196 Porrill, J., Dean, P., and Anderson, S.R. (2013). Adaptive filters and internal models: Multilevel  
1197 description of cerebellar function. *Neural Netw.* *47*, 134–149.
- 1198 Robinson, D.A. (1981). The Use of Control Systems Analysis in the Neurophysiology of Eye  
1199 Movements. *Annu. Rev. Neurosci.* *4*, 463–503.

- 1200 Sibindi, T.M., Holland, P.J., van der Geest, J.N., Donchin, O., and Frens, M.A. (2016). Superposition  
1201 Violations in the Compensatory Eye Movement System. *Investig. Ophthalmology Vis. Sci.* *57*,  
1202 3554.
- 1203 Sohmer, H., Elidan, J., Plotnik, M., Freeman, S., Sockalingam, R., Berkowitz, Z., and Mager, M.  
1204 (1999). Effect of noise on the vestibular system - Vestibular evoked potential studies in rats.  
1205 *Noise Health* *2*, 41.
- 1206 Soodak, R.E., and Simpson, J.I. (1988). The accessory optic system of rabbit. I. Basic visual  
1207 response properties. *J. Neurophysiol.* *60*, 2037–2054.
- 1208 Stahl, J.S., and Simpson, J.I. (1995). Dynamics of abducens nucleus neurons in the awake rabbit.  
1209 *J. Neurophysiol.* *73*, 1383–1395.
- 1210 Stahl, J.S., van Alphen, A.M., and De Zeeuw, C.I. (2000). A comparison of video and magnetic  
1211 search coil recordings of mouse eye movements. *J. Neurosci. Methods* *99*, 101–110.
- 1212 Stahl, J.S., Thumser, Z.C., May, P.J., Andrade, F.H., Anderson, S.R., and Dean, P. (2015). Mechanics  
1213 of mouse ocular motor plant quantified by optogenetic techniques. *J. Neurophysiol.* *114*, 1455–  
1214 1467.
- 1215 Todorov, E. (2004). Optimality principles in sensorimotor control (review). *Nat. Neurosci.* *7*,  
1216 907–915.
- 1217 Yang, A., and Hullar, T.E. (2007). Relationship of semicircular canal size to vestibular-nerve  
1218 afferent sensitivity in mammals. *J. Neurophysiol.* *98*, 3197–3205.
- 1219 Yoshida, K., Watanabe, D., Ishikane, H., Tachibana, M., Pastan, I., and Nakanishi, S. (2001). A Key  
1220 Role of Starburst Amacrine Cells in Originating Retinal Directional Selectivity and Optokinetic  
1221 Eye Movement. *Neuron* *30*, 771–780.



1222 **Figure Supplements**

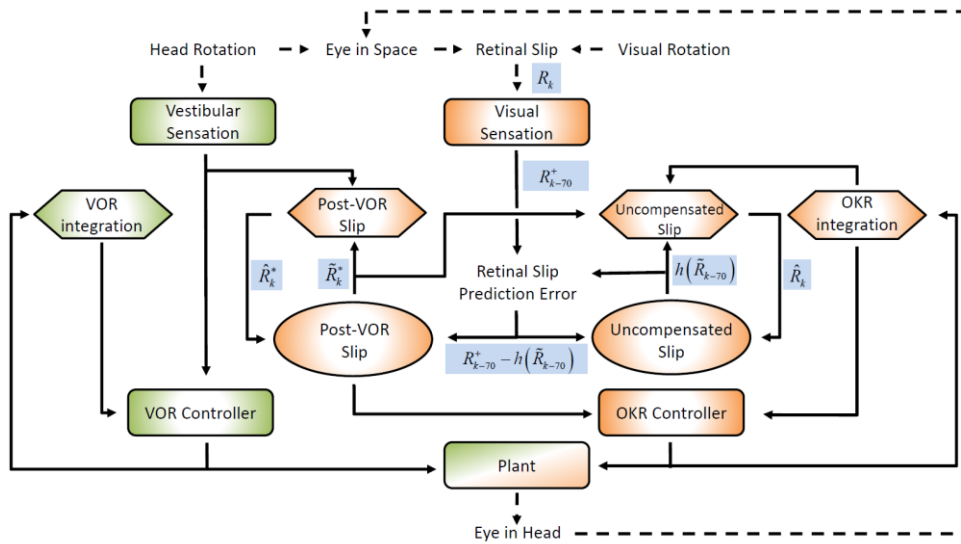

1223

1224 **Figure 1-figure supplement 1.** Schematic representation of the model architecture with the different  
 1225 internal and external representation of retinal slip indicated in blue rectangles adjacent to the  
 1226 corresponding arrows. The color and shape coding of the figure is maintained from Figure 1 in the  
 1227 main text.

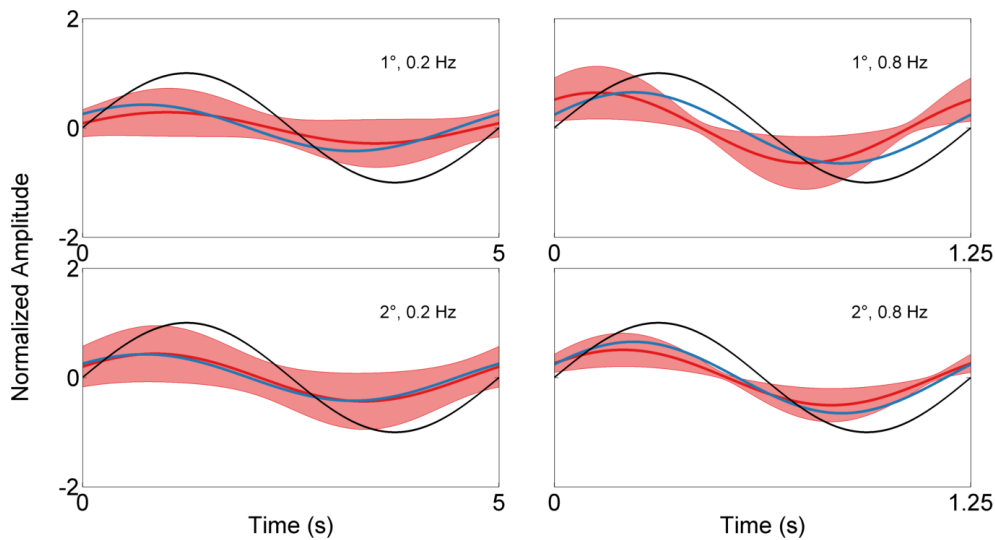

1228

1229 **Figure 3-figure supplement 1.** Examples of a sinusoid fitted to the model output (blue) and the mean  
 1230 measured response (red line) in response to a VOR stimulation (black line). The shaded red region

1231 *represents the standard deviation of the population. The upper panels display the response to a 1°*  
1232 *stimulus and the bottom panels correspond to a 2° stimulus. In both cases the left and right panels*  
1233 *display the response to a 0.2 Hz and 0.8 Hz stimulus respectively. The format of the plots matches that*  
1234 *of Figure 2 with the model output now represented with a fitted sinusoid (no longer including the high*  
1235 *frequency noise included in the raw model output) for more direct comparison to the behavioral data*  
1236 *which also represents the output of fitting sinusoids to the behavioral data.*

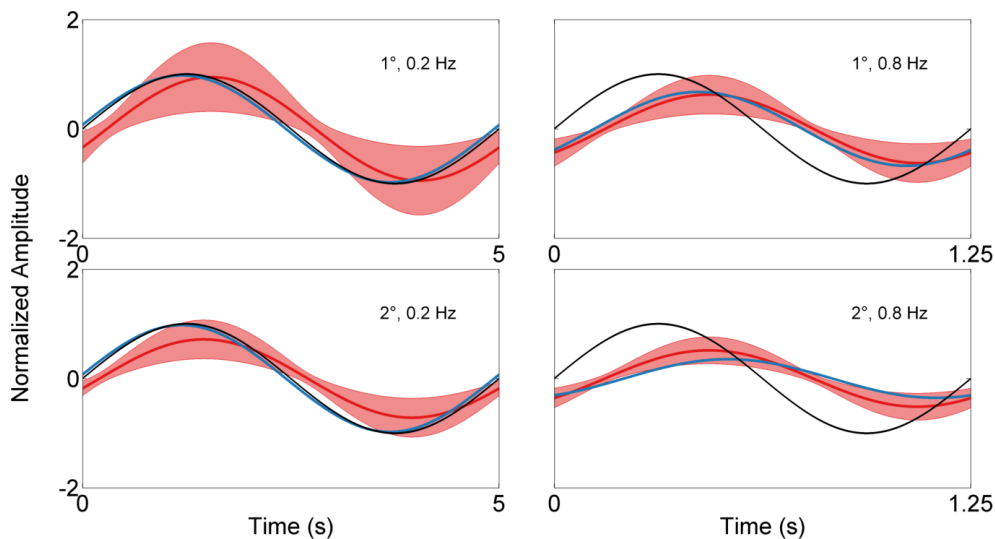

1237

1238 **Figure 4-figure supplement 1.** *Examples of a sinusoid fitted to the model output (blue) and the mean*  
1239 *measured response (red line) in response to a OKR stimulation (black line). The shaded red region*  
1240 *represents the standard deviation of the population. The stimuli presented match that of Figure 4 and*  
1241 *Figure 3-figure supplement 1.*

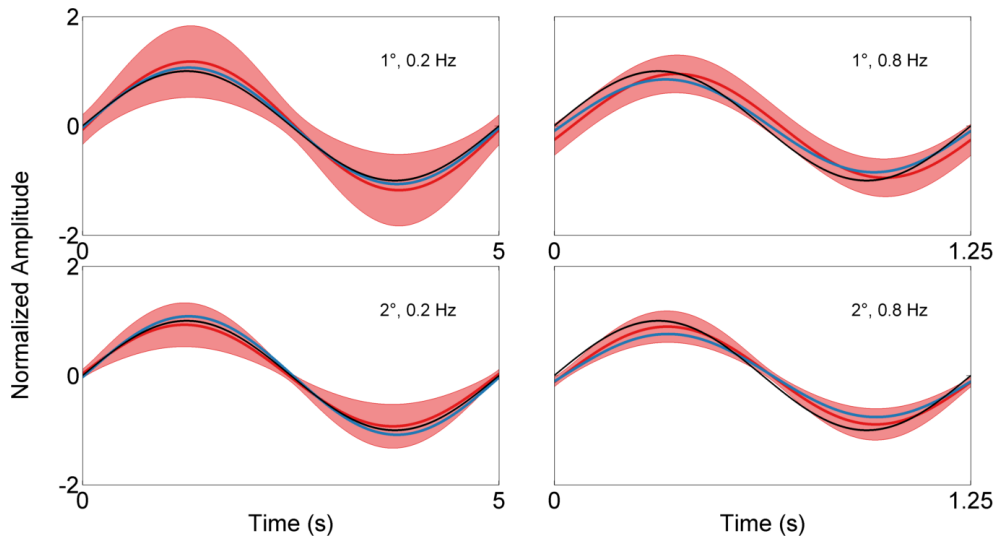

1242

1243 **Figure 5-figure supplement 1.** Examples of a sinusoid fitted to the model output (blue) and the mean  
1244 measured response (red line) in response to a vVOR stimulation (black line). The shaded red region  
1245 represents the standard deviation of the population. The stimuli presented match that of Figure 5 and  
1246 Figure 3-figure supplement 1.

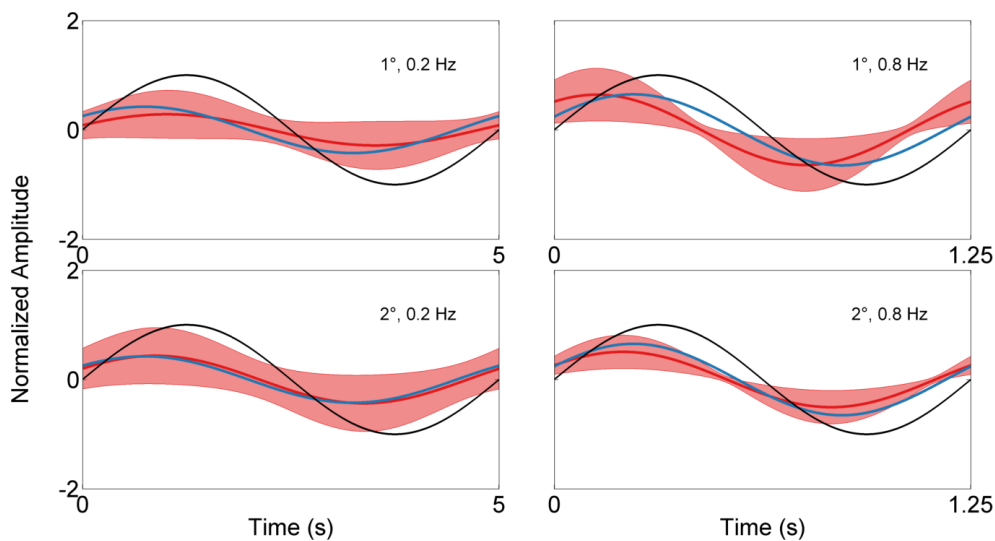

1247

1248 **Figure 6-figure supplement 1.** Examples of a sinusoid fitted to the model output (blue) and the mean  
1249 measured response (red line) in response to a sVOR stimulation (black line). The shaded red region

1250 *represents the standard deviation of the population. The stimuli presented match that of Figure 6 and*  
1251 *Figure 3-figure supplement 1.*

1252

1253

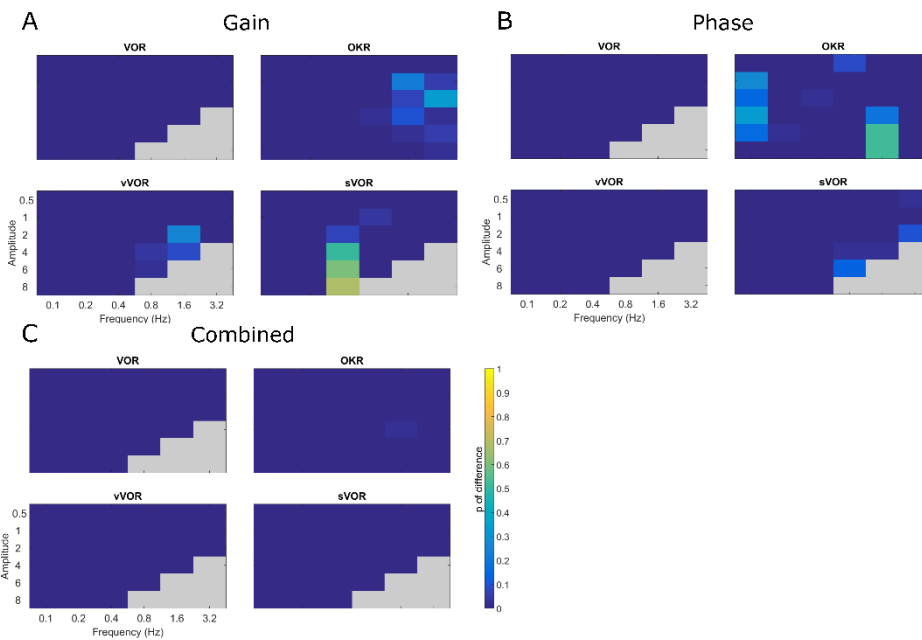

1254

1255

1256 **Figure 7-figure supplement 1.** *Summary of the statistical testing representing the probability that the*  
1257 *model response falls outside the range of a 'typical mouse' in terms of gain (A), phase (B) and the*  
1258 *combined probability (C). Overall, despite deviations in gain or phase in a minority of individual*  
1259 *conditions, the model response is indistinguishable from the experimental data as indicated by the*  
1260 *'cool' colors in the combined probability graph. Full details of each individual test performed are*  
1261 *available as tables in the source data for this figure.*

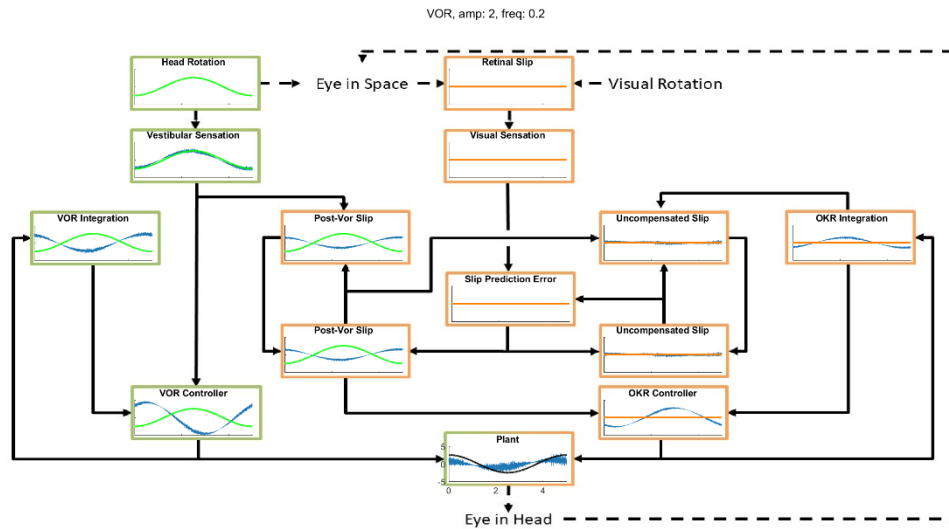

1262

1263 **Figure 8-figure supplement 1.** An example of the model dynamics for one cycle of the simulation in  
 1264 the VOR condition (Stimulation amplitude of 2 degrees at a frequency of 0.2 Hz) at a time by which  
 1265 the system has reached a steady state. The layout matches the model schematic presented in Figure  
 1266 1. In each box the blue line represents the output of the computation performed, the green or orange  
 1267 line represents the appropriate stimulus, vestibular and visual respectively.

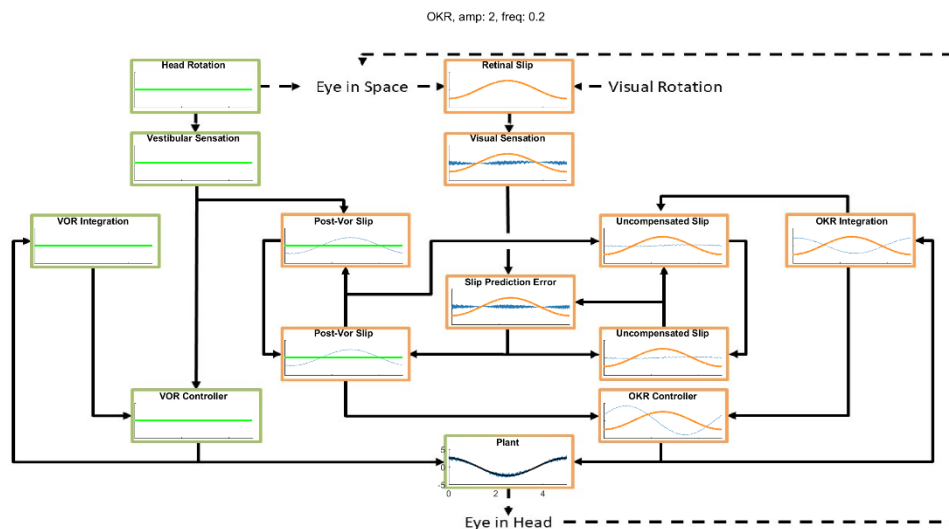

1268

1269 **Figure 8-figure supplement 2.** An example of the model dynamics for one cycle of the simulation in  
 1270 the OKR condition (Stimulation amplitude of 2 degrees at a frequency of 0.2 Hz) at a time by which

1271 the system has reached a steady state. The layout matches the model schematic presented in Figure  
 1272 1. In each box the blue line represents the output of the computation performed, the green or orange  
 1273 line represents the appropriate stimulus, vestibular and visual respectively.  
 1274

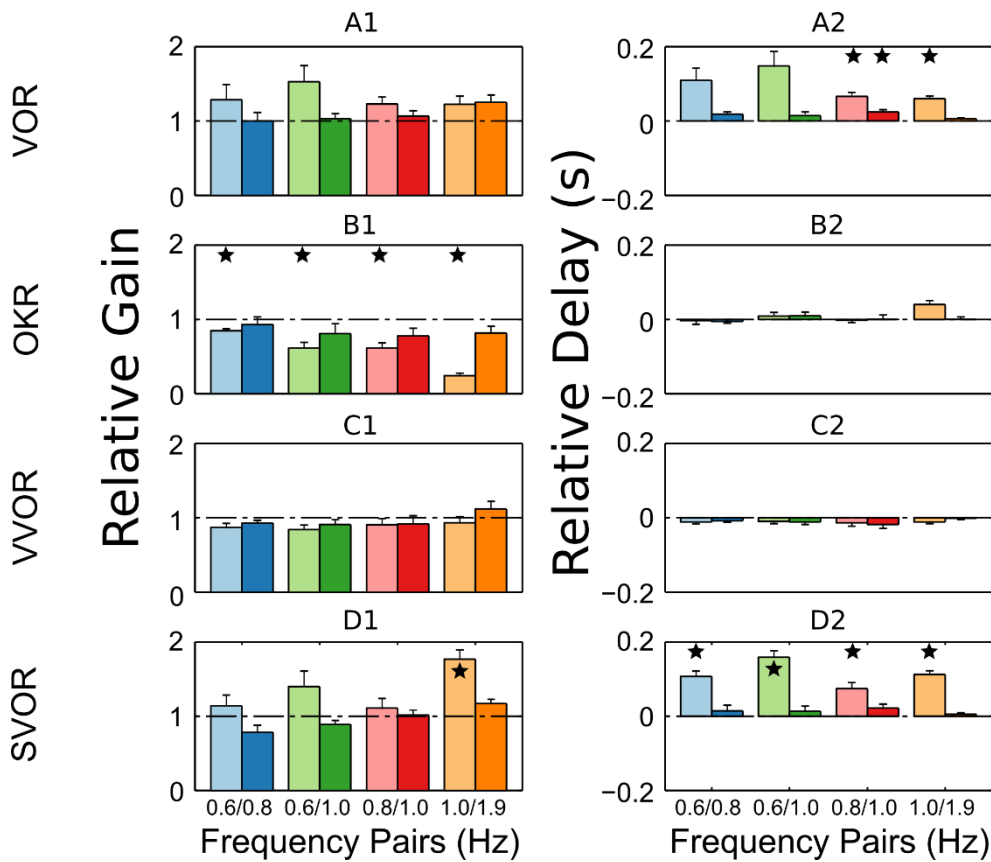

1275  
 1276 **Figure 9-figure supplement 1.** Summary of the behavioral response of *c57BL/6* mice ( $n=8$ ) to Sum  
 1277 of Sines stimulation. The response is described in terms of gains and lags relative to the gain and lag  
 1278 recorded in response to the single frequency component presented in isolation. A linear system will  
 1279 produce only relative gains of 1 and relative delays of 0, indicated by dashed horizontal lines on  
 1280 each plot. The pattern of nonlinearities produced is similar to that produced by the full model  
 1281 (Figure 7A). This figure is directly reproduced from Sibindi et al. (2016; Figure 6).

1282
